# Supplementary material for: Effects of the apple matrix on the postprandial bioavailability of flavan-3-ols and nutrigenomic response of apple polyphenols in minipigs challenged with a high fat meal
Source: Royal Society of Chemistry journal article supplement (doi:10.1039/d0fo00346h), 2020-01-01
Supplement: d0fo00346h1.xlsx [file d0fo00346h1.xlsx]

## Sheet: FC>1,25 
Agilent ProbeName	p value (Friedman)	Fold change compared to HFM			Gene information
		HFM + Raw apples	HFM + Apple puree	HFM + PP extract	GeneName	GeneSymbol	EntrezGeneID	GenbankAccession	UniGeneID
A_72_P016096	0.00356957	1.60838	1.97339	1.90739				AK349054	Ssc,24926
A_72_P687827	0.00446676	-1.06576	-1.34335	-1.2795
A_72_P323563	0.00499571	1.15406	-1.47551	-1.16923
A_72_P020036	0.00558655	2.31588	1.73699	1.02809				XR_131015	Ssc,48325
A_72_P240442	0.00558655	-2.28311	-1.54135	-1.09631
A_72_P260507	0.00558655	1.51	1.17159	1.62407
A_72_P287864	0.00558655	1.40045	1.83934	-1.02049				XR_307904
A_72_P705140	0.00558655	1.0112	1.41032	1.15908
A_72_P012656	0.00698319	1.02707	-1.29321	-2.24225				CX058684	Ssc,33782
A_72_P012671	0.00698319	1.76937	1.32033	-1.10697	solute carrier family 27 member 5	SLC27A5	102158419	AK233227	Ssc,33785
A_72_P037651	0.00698319	1.33691	-1.51004	-1.05017
A_72_P072831	0.00698319	-1.53829	-1.2138	-1.21606
A_72_P076311	0.00698319	-1.19939	-1.47658	-1.07073
A_72_P130156	0.00698319	-1.50578	-1.6122	1.08878
A_72_P142886	0.00698319	-1.07925	-1.49465	-1.02395
A_72_P157666	0.00698319	1.39419	1.14389	1.06394	ribosomal protein S16	RPS16	414397	NM_001137620	Ssc,16651
A_72_P159931	0.00698319	-1.19218	-1.69627	-1.03763
A_72_P165076	0.00698319	-1.49649	-1.29981	-1.01377	TNF superfamily member 13	TNFSF13	100127162	NM_001112690	Ssc,26879
A_72_P179236	0.00698319	-1.59642	-1.91894	-1.00207
A_72_P284989	0.00698319	-1.11555	1.61759	1.16373				AK233842	Ssc,25117
A_72_P297009	0.00698319	1.27027	1.04465	1.23926	lin-28 homolog A	LIN28A	100142662	CN161873	Ssc,70783
A_72_P357468	0.00698319	1.59194	1.43828	1.43835	YTH domain containing 1	YTHDC1	110262114	AK349020
A_72_P363843	0.00698319	1.73079	1.28201	1.19262	G2/M-phase specific E3 ubiquitin protein ligase	G2E3	100153402	AK238743	Ssc,24829
A_72_P415733	0.00698319	1.46198	1.43034	-1.03338				BQ599989	Ssc,8002
A_72_P078886	0.00780574	1.20771	1.46726	1.1779	RNA polymerase I subunit D	POLR1D	100627477	AY609769	Ssc,18668
A_72_P079121	0.00780574	-1.4936	1.08328	1.78338
A_72_P086191	0.00780574	1.31588	1.11389	1.11388	NIMA related kinase 1	NEK1	100520589	DY419911	Ssc,9260
A_72_P189001	0.00780574	1.58987	1.30681	1.2708	adducin 3	ADD3	100155574	AK238010	Ssc,12129
A_72_P208922	0.00780574	-1.46937	1.2776	1.05854	choline dehydrogenase	CHDH	100151982	AK393413	Ssc,23240
A_72_P244802	0.00780574	-1.53736	-1.4217	1.64543
A_72_P372568	0.00780574	-1.522	-1.5891	-1.34255	discoidin, CUB and LCCL domain containing 1	DCBLD1	100156679	XM_005654388
A_72_P491624	0.00780574	1.39381	2.22437	1.07861	family with sequence similarity 162 member B	FAM162B	100152527
A_72_P081381	0.00872384	1.80973	2.5016	-1.14829
A_72_P125856	0.00872384	-1.52957	-1.85059	-1.24395	glycerophosphocholine phosphodiesterase 1	GPCPD1	100152321	AK230830	Ssc,72613
A_72_P559434	0.00872384	1.28475	1.06823	1.15555	ATP synthase, H+ transporting, mitochondrial F1 complex, O subunit	ATP5O	733678	NM_001044606	Ssc,6723
A_72_P706438	0.00872384	1.77709	2.59826	1.43495
A_72_P144991	0.0108914	1.02325	-1.79759	1.67072
A_72_P146871	0.0108914	-1.19251	1.25105	-1.07452	fizzy and cell division cycle 20 related 1	FZR1	497234	NM_001012296	Ssc,15894
A_72_P172381	0.0108914	-1.31516	1.13824	-1.02597	cytohesin 4	CYTH4	100240722
A_72_P196427	0.0108914	-1.72988	-1.12693	1.14025
A_72_P214172	0.0108914	1.71396	1.0423	1.21644
A_72_P355193	0.0108914	1.5545	1.33295	1.16018
A_72_P366488	0.0108914	1.68364	1.69376	1.2121
A_72_P386218	0.0108914	-1.94826	-1.12243	-1.1308
A_72_P390678	0.0108914	1.03592	1.47152	1.24775
A_72_P716913	0.0108914	1.50802	2.3297	1.24653
A_72_P049031	0.0121664	2.0657	1.42312	1.12417				XM_005667298
A_72_P124996	0.0121664	2.00361	2.40176	1.3497
A_72_P242017	0.0121664	1.10222	-2.4662	-1.30322
A_72_P281489	0.0121664	-1.63148	1.02075	-1.39995
A_72_P335618	0.0121664	1.22614	-1.05426	1.07805	intraflagellar transport 57	IFT57	100519335	AY609628	Ssc,13576
A_72_P382888	0.0121664	-1.47105	-1.09686	-1.46473
A_72_P386833	0.0121664	-1.21551	-1.01225	-1.26409				AK233448	Ssc,31771
A_72_P434559	0.0121664	-1.0089	-1.25025	-1.05692
A_72_P497677	0.0121664	1.04189	1.39578	1.21398
A_72_P501454	0.0121664	1.27615	1.13844	-1.17638
A_72_P577898	0.0121664	2.16854	1.98328	1.05666	cathepsin V	CTSV	396926	NM_213892	Ssc,54036
A_72_P613317	0.0121664	-1.39253	-1.54036	-1.15962	lysophospholipase I	LYPLA1	100152491	AK237606	Ssc,9406
A_72_P677750	0.0121664	-1.38175	-1.45	-1.12136	lysophospholipase I	LYPLA1	100152491	AK237606	Ssc,9406
A_72_P000036	0.0135883	1.24888	1.44397	1.12484				XM_003358195
A_72_P008081	0.0135883	2.2568	1.92858	1.01742
A_72_P047561	0.0135883	-1.03794	1.6687	1.16667
A_72_P049846	0.0135883	1.49404	1.29273	1.59963				XM_003126391
A_72_P050456	0.0135883	-1.1341	1.0789	1.39397				BX915984	Ssc,25392
A_72_P050801	0.0135883	1.38387	-1.35686	1.00803
A_72_P055156	0.0135883	1.37263	-1.02271	1.15689	F-box protein 30	FBXO30	100519988	XM_003121151	Ssc,37246
A_72_P081966	0.0135883	-1.74721	-1.91353	-1.62293				AK239585	Ssc,31046
A_72_P111496	0.0135883	-1.52737	-1.31455	-1.07144
A_72_P117606	0.0135883	-1.53278	1.30005	-1.09619	retinoic acid receptor alpha	RARA	396709	U82260	Ssc,15829
A_72_P118836	0.0135883	1.43155	1.66379	1.21681				XM_005654014
A_72_P123641	0.0135883	-1.64887	-1.3128	-1.20728
A_72_P139836	0.0135883	1.0352	1.26817	1.16881	MIER family member 2	MIER2	100517458	XM_013994851
A_72_P142806	0.0135883	-1.1605	1.38041	1.36673
A_72_P157716	0.0135883	-1.26405	1.61533	-1.19052	claudin 4	CLDN4	733578	AK233156	Ssc,95986
A_72_P159091	0.0135883	1.56575	2.12299	1.61686				BQ602092	Ssc,14384
A_72_P196342	0.0135883	1.51883	1.30548	1.16944
A_72_P203382	0.0135883	-1.21532	-1.49316	-1.24013				CN158781	Ssc,59478
A_72_P206487	0.0135883	-1.48438	-1.62232	-1.27067	glutathione-disulfide reductase	GSR	396625	AK234079	Ssc,23488
A_72_P213997	0.0135883	1.55911	1.56744	1.40574
A_72_P225337	0.0135883	1.07154	1.57125	-1.36624				BX920233	Ssc,22264
A_72_P225442	0.0135883	-2.01011	-2.82566	-2.42111				DN110489	Ssc,22288
A_72_P231272	0.0135883	-2.14896	1.05843	-1.85168	Rho guanine nucleotide exchange factor 37	ARHGEF37	100514827	AK350866	Ssc,96483
A_72_P233742	0.0135883	-1.25814	-1.28477	-1.5244
A_72_P234107	0.0135883	-1.00777	1.94755	1.03589	beta-ureidopropionase 1	UPB1	100155919	AK232712	Ssc,18596
A_72_P234207	0.0135883	-1.01413	-1.8339	-1.02171	vertebrae development associated	VRTN	100157734	NM_001195113	Ssc,75459
A_72_P245172	0.0135883	1.17583	1.41787	1.1815
A_72_P248467	0.0135883	1.32169	-1.36318	-1.14021	THAP domain containing 6	THAP6	100737143	AK343911	Ssc,26609
A_72_P269374	0.0135883	-1.67679	-1.86392	-1.01879	syncoilin, intermediate filament protein	SYNC	100620771	XM_013999124
A_72_P274829	0.0135883	-1.05049	1.6994	1.12879
A_72_P279619	0.0135883	-1.5824	-2.54044	-1.6754
A_72_P283519	0.0135883	-1.90904	-1.25507	1.10004
A_72_P283759	0.0135883	1.89331	-1.07124	1.16776				DN104147	Ssc,98585
A_72_P283799	0.0135883	-1.23648	-1.32398	-1.31523
A_72_P284459	0.0135883	-1.10964	-1.13228	-1.53575				DN131442	Ssc,37759
A_72_P303424	0.0135883	1.6523	2.34809	1.54049
A_72_P327958	0.0135883	1.25572	1.04749	1.00689	translocase of inner mitochondrial membrane 8A	TIMM8A	100517443	AK396629	Ssc,22719
A_72_P329083	0.0135883	-1.03801	1.51576	1.10245				BX914821	Ssc,22480
A_72_P331463	0.0135883	-1.36348	1.38743	1.05537	forkhead box M1	FOXM1	100511565	AK398395	Ssc,1886
A_72_P332063	0.0135883	-1.6803	-2.31205	1.08073				AJ961384	Ssc,46464
A_72_P335598	0.0135883	-1.6739	-1.04951	-1.2704				BQ602739	Ssc,13570
A_72_P359378	0.0135883	-1.54059	1.48145	-1.16473				XM_003360982
A_72_P362058	0.0135883	-1.42541	-1.58672	-1.29359
A_72_P370913	0.0135883	-1.44429	-2.50059	1.29647				BX926308	Ssc,97868
A_72_P375308	0.0135883	-1.5446	1.33393	-1.33481				XM_013978510
A_72_P376778	0.0135883	-1.02223	-1.53127	-1.18839				CF792683	Ssc,9468
A_72_P383243	0.0135883	1.43669	1.12677	1.11459	acyl-CoA synthetase long chain family member 3	ACSL3	100233169	NM_001143698	Ssc,2176
A_72_P383743	0.0135883	1.11306	1.28444	1.15142	bromodomain containing 2	BRD2	100141307	NM_001123085	Ssc,20953
A_72_P393468	0.0135883	1.51469	2.60493	1.39842				XR_131392	Ssc,29499
A_72_P444554	0.0135883	1.67216	1.26454	1.1027	ribosomal protein S16	RPS16	414397	NM_001137620	Ssc,16651
A_72_P453464	0.0135883	1.15005	1.46813	1.30312	single-pass membrane protein with aspartate rich tail 1	SMDT1	100737924
A_72_P465550	0.0135883	-1.21696	1.32122	2.3067	dystrophin	DMD	497636	NM_001012408	Ssc,42754
A_72_P486602	0.0135883	1.46668	1.45489	1.21711	TBCC domain containing 1	TBCCD1	100154090	XM_005652362
A_72_P501449	0.0135883	-1.06603	-1.32278	-1.12696	neuroplastin	NPTN	100155307	AK396420	Ssc,70468
A_72_P503857	0.0135883	-1.1435	-1.46054	-1.091	KIAA1468 ortholog	KIAA1468	100521354	XM_003121702	Ssc,18797
A_72_P545596	0.0135883	1.39554	1.44014	1.28848				XM_013986717
A_72_P572009	0.0135883	1.661	1.60973	1.16223	prostaglandin reductase 2	PTGR2	100156930	AY609479	Ssc,5013
A_72_P574774	0.0135883	-4.04045	-4.31316	-3.31615				AK230813	Ssc,26819
A_72_P615021	0.0135883	1.19953	2.30512	1.2077	tubulin alpha 1b	TUBA1B	733594	AK233776	Ssc,57193
A_72_P660368	0.0135883	1.22187	1.33709	1.1294	ubiquitin conjugating enzyme E2 Q1	UBE2Q1	100156747	AY609725	Ssc,8537
A_72_P723783	0.0135883	1.93351	2.32517	1.27701	tropomyosin 1	TPM1	100037999	NM_001097483	Ssc,37889
A_72_P773461	0.0135883	1.40564	2.32217	1.12922
A_72_P779608	0.0135883	1.78952	1.82804	1.92965				AK236591	Ssc,31932
A_72_P794061	0.0135883	1.50746	2.17854	1.44975	epithelial cell adhesion molecule	EPCAM	403163	NM_214419	Ssc,51858
A_72_P021671	0.0169404	-1.22185	-1.42605	-1.22966
A_72_P036871	0.0169404	1.4791	1.95	1.11613
A_72_P146246	0.0169404	-1.28106	-1.25872	-1.6857
A_72_P148336	0.0169404	1.43262	1.60581	1.29299	TNF receptor associated factor 3	TRAF3	100156979	XM_005666444
A_72_P157621	0.0169404	-2.74245	-1.6835	-1.51667	somatostatin receptor 5	SSTR5	396642	AY156052	Ssc,16622
A_72_P158456	0.0169404	1.09436	-1.40566	1.27697				BQ600605	Ssc,14170
A_72_P193817	0.0169404	1.77459	1.839	1.17092
A_72_P209602	0.0169404	-1.09747	-2.11574	-1.65811	sperm associated antigen 11	SPAG11	100170139	NM_001129977	Ssc,72509
A_72_P223297	0.0169404	1.29288	1.45269	1.15394	B-cell CLL/lymphoma 10	BCL10	100125346	NM_001103213	Ssc,12948
A_72_P229722	0.0169404	1.62591	1.91334	-1.1404
A_72_P290564	0.0169404	-1.29744	1.0887	1.0153	kelch like family member 13	KLHL13	100519287	AK349310	Ssc,97149
A_72_P305449	0.0169404	-1.57471	-1.37563	-1.02756
A_72_P352193	0.0169404	-1.24091	-1.06311	-2.088				BF702043	Ssc,5400
A_72_P378958	0.0169404	-1.10498	-1.40183	-1.17686
A_72_P380763	0.0169404	1.02257	1.52595	1.38207
A_72_P386928	0.0169404	1.5157	-1.34582	1.52221
A_72_P389123	0.0169404	1.40005	1.49793	-1.21558
A_72_P505655	0.0169404	-1.15479	1.14606	-1.25263	contactin 1	CNTN1	100521555	XM_003355617
A_72_P568279	0.0169404	-1.25781	-1.55154	-1.26608	integral membrane protein 2B	ITM2B	595120	AK233398	Ssc,1037
A_72_P747636	0.0169404	1.57851	1.32781	1.34331	ribosomal protein S23	RPS23	396638	FD588582	Ssc,784
A_72_P321038	0.0187404	-1.3803	-1.15907	-1.0645	glyceraldehyde-3-phosphate dehydrogenase	GAPDH	396823	NM_001206359	Ssc,16135
A_72_P716828	0.0187404	1.0804	2.0157	1.09896	IgG heavy chain	LOC396781	396781	NM_213828	Ssc,39099
A_72_P000001	0.0189092	1.021	1.33068	1.34392
A_72_P001096	0.0189092	-1.06781	-1.53941	-1.01743	zinc finger protein 331	ZNF331	110261294	AK347823	Ssc,32567
A_72_P013386	0.0189092	-1.09615	-1.31683	-1.36532				AK396316	Ssc,102052
A_72_P015926	0.0189092	-1.01863	-1.33034	1.59258	ganglioside induced differentiation associated protein 1 like 1	GDAP1L1	100625236	AK390196	Ssc,60206
A_72_P020771	0.0189092	1.72372	1.3571	1.07685
A_72_P020791	0.0189092	1.67059	2.30014	-1.16244	nephrocystin 1	NPHP1	100523176	AK352470	Ssc,21735
A_72_P025926	0.0189092	1.4507	1.69653	1.0067	chromodomain helicase DNA binding protein 4	CHD4	100515610	AK231358	Ssc,96050
A_72_P029736	0.0189092	1.40809	1.47148	1.19958
A_72_P032816	0.0189092	1.27711	1.47526	1.3388
A_72_P032921	0.0189092	1.05359	1.257	1.09636	transmembrane protein 39B	TMEM39B	110261131	AK235045	Ssc,45611
A_72_P042931	0.0189092	-1.41323	-1.38144	-3.08328				DN119885	Ssc,7481
A_72_P056296	0.0189092	-1.05872	1.3215	1.16574				AK347919	Ssc,31758
A_72_P057471	0.0189092	2.17669	-1.26092	-1.32233	DnaJ heat shock protein family (Hsp40) member A4	DNAJA4	397613	NM_214339	Ssc,17243
A_72_P066816	0.0189092	-1.38454	-1.40444	1.0412	protein phosphatase with EF-hand domain 1	PPEF1	100623891	AK348961
A_72_P080421	0.0189092	-2.3218	-2.498	-1.15578	CD163 molecule	CD163	397031	AK389626	Ssc,5053
A_72_P085731	0.0189092	1.67727	1.02848	1.13891				AK236880	Ssc,50106
A_72_P086696	0.0189092	-1.43009	1.03331	-1.41677				EW540536	Ssc,62541
A_72_P096371	0.0189092	1.34033	-1.02383	1.05843	ERGIC and golgi 2	ERGIC2	100512051
A_72_P107266	0.0189092	-1.48735	-1.38121	-1.11187	signal induced proliferation associated 1 like 1	SIPA1L1	100157762	XM_013989143
A_72_P129586	0.0189092	-1.43739	1.79597	1.05995				FS666748	Ssc,66902
A_72_P134536	0.0189092	1.42975	1.26948	1.00298				CK467420	Ssc,29275
A_72_P170576	0.0189092	-1.52754	-1.0214	-1.37756
A_72_P187836	0.0189092	-1.1566	1.66338	-1.09225				AJ949770	Ssc,36785
A_72_P188206	0.0189092	1.50267	1.61417	1.55931				AJ948856	Ssc,36879
A_72_P201052	0.0189092	-1.05322	-2.78252	1.09521	leucine rich repeat containing G protein-coupled receptor 5	LGR5	100151994	AK234147	Ssc,31861
A_72_P209527	0.0189092	-1.44158	1.17125	-1.31284
A_72_P223617	0.0189092	-1.01103	1.48062	1.08764	ST6 N-acetylgalactosaminide alpha-2,6-sialyltransferase 4	ST6GALNAC4	396676	NM_213784	Ssc,23781
A_72_P226392	0.0189092	1.0319	1.56677	-1.08127	mediator of DNA damage checkpoint 1	MDC1	100144453	NM_001123138	Ssc,70644
A_72_P241432	0.0189092	-1.09514	1.64633	1.00514
A_72_P242537	0.0189092	-1.25192	1.99925	-1.1361	piggyBac transposable element derived 1	PGBD1	100739221	XM_003482141
A_72_P258692	0.0189092	2.0199	2.0263	1.03738
A_72_P263192	0.0189092	1.03733	-1.64085	-1.32132
A_72_P266797	0.0189092	1.86568	-1.10912	1.04336
A_72_P280679	0.0189092	-1.15712	-1.23066	1.47639
A_72_P288134	0.0189092	-1.55845	-1.37106	-1.11117	mucin 19, oligomeric	MUC19	396897	NM_001113286	Ssc,68696
A_72_P321638	0.0189092	1.09719	2.09366	-1.13463	transmembrane protein 108	TMEM108	100521929	CF181224	Ssc,61805
A_72_P351578	0.0189092	-2.09908	-2.58967	-1.10168				AK346256	Ssc,18697
A_72_P369828	0.0189092	2.38683	3.00507	2.13968				CJ014613	Ssc,53096
A_72_P383773	0.0189092	-2.09594	-1.13062	-1.32311
A_72_P387458	0.0189092	-1.7416	-1.67346	-1.25214
A_72_P387963	0.0189092	-2.06187	-2.33099	-1.57262				XM_005657462	Ssc,19409
A_72_P399303	0.0189092	-1.66029	-1.06045	-1.61863				AJ957278	Ssc,36122
A_72_P430724	0.0189092	1.03297	-1.57371	-1.4972
A_72_P442801	0.0189092	1.04801	1.36561	1.08901				AK346083	Ssc,21937
A_72_P465525	0.0189092	-1.0714	-1.69398	-1.31367	interleukin 1 receptor accessory protein like 1	IL1RAPL1	100621199	XM_003360251
A_72_P475323	0.0189092	-1.4926	-2.01805	-2.03547	zinc finger protein 697	ZNF697	100154558	XM_013988104
A_72_P489114	0.0189092	-1.47432	-1.15189	-1.0062	tetratricopeptide repeat domain 13	TTC13	100157092	XM_001926662	Ssc,17546
A_72_P489602	0.0189092	1.08379	-1.79997	1.90406	adipogenesis regulatory factor	ADIRF	100154721	NM_001243503	Ssc,79998
A_72_P511215	0.0189092	-1.2626	1.27013	1.0407				AK349144	Ssc,43023
A_72_P563284	0.0189092	-1.04835	-1.43597	-1.01239	creatine kinase, mitochondrial 2	CKMT2	733602	NM_001044551	Ssc,14462
A_72_P575864	0.0189092	-1.01446	-1.26112	-1.05649	catenin beta 1	CTNNB1	397657	NM_214367	Ssc,25839
A_72_P599233	0.0189092	2.06402	-1.3413	1.73954	carbonic anhydrase 2	LOC100154873	100154873	AK232899	Ssc,54162
A_72_P623643	0.0189092	-1.48148	1.21604	-1.29952	C-C motif chemokine ligand 5	CCL5	396613	NM_001129946	Ssc,22030
A_72_P629061	0.0189092	1.22605	1.82513	1.1866				AK391164	Ssc,48140
A_72_P690851	0.0189092	-1.02518	-1.11725	-1.75341	frizzled-related protein	FRZB	100152419	NM_001243330	Ssc,8149
A_72_P711793	0.0189092	1.13382	2.22034	1.16445	IgG heavy chain	LOC396781	396781	NM_213828	Ssc,39099
A_72_P735663	0.0189092	1.08564	2.20973	1.14971	aurora kinase B	AURKB	396955	NM_213919	Ssc,2895
A_72_P740679	0.0189092	1.4413	1.26332	1.26131	RNA polymerase II subunit B	POLR2B	397001	AK348591	Ssc,55326
A_72_P000276	0.0211025	1.68057	1.751	1.33594
A_72_P004796	0.0211025	-1.21444	1.06891	-1.50426
A_72_P005396	0.0211025	-1.09236	-2.08194	-1.48067	kinesin family member 27	KIF27	100622281	DN102165	Ssc,38644
A_72_P007396	0.0211025	-1.24033	-1.30439	1.41288
A_72_P009196	0.0211025	-2.26707	1.08611	-1.28544				AJ955138	Ssc,46003
A_72_P019911	0.0211025	-2.20394	-2.16062	1.2999
A_72_P032491	0.0211025	-1.08409	2.2401	-1.11279				XM_013978392
A_72_P037426	0.0211025	-1.13373	-1.50224	-1.02287
A_72_P046056	0.0211025	-1.49784	1.1235	-1.01332	fibroblast growth factor receptor 1	FGFR1	100153248	AK236501	Ssc,17773
A_72_P046401	0.0211025	1.19455	1.41153	1.17264	glycerol-3-phosphate dehydrogenase 1 like	GPD1L	100624347	AK237599	Ssc,24184
A_72_P047366	0.0211025	-1.55757	-1.51034	-1.42266				AJ959044	Ssc,46288
A_72_P050951	0.0211025	-1.50113	1.12835	-1.0006
A_72_P057711	0.0211025	-1.31102	-1.19494	1.00604
A_72_P058261	0.0211025	2.61025	2.3689	1.65943
A_72_P072551	0.0211025	1.01732	-1.27349	-1.00334
A_72_P072901	0.0211025	-1.68965	-1.13671	-1.08309
A_72_P076086	0.0211025	-1.57117	1.02051	-1.79326				XM_013998970
A_72_P078666	0.0211025	-1.4441	-1.2998	-1.42874
A_72_P080196	0.0211025	-1.0243	-1.28228	-1.16343				XM_005671635
A_72_P081481	0.0211025	1.29709	1.09792	1.18028	transmembrane protein 14A	TMEM14A	100512176	AY609736	Ssc,2842
A_72_P088946	0.0211025	-1.00635	-1.55311	-1.20694
A_72_P090391	0.0211025	1.04952	-1.30894	1.04486
A_72_P095371	0.0211025	1.09564	-1.59	-1.05875
A_72_P098146	0.0211025	1.43029	1.60963	1.22598	A-kinase anchoring protein 2	AKAP2	100153149	NM_001204181	Ssc,80731
A_72_P100406	0.0211025	1.173	1.62218	1.21897				AK238739	Ssc,5167
A_72_P103526	0.0211025	-1.76441	-2.23044	1.09769
A_72_P111281	0.0211025	-1.75872	1.32184	1.13449				CO944756	Ssc,40477
A_72_P112816	0.0211025	-1.93203	-2.02534	-1.80573				EW226453	Ssc,68106
A_72_P122206	0.0211025	-2.24931	-1.46777	-1.48986
A_72_P122851	0.0211025	1.08718	-1.05317	-2.94443
A_72_P139726	0.0211025	2.36399	2.06359	1.15001
A_72_P140936	0.0211025	1.30953	1.11515	1.10769				BP143999	Ssc,26178
A_72_P145966	0.0211025	-1.03327	1.04616	-1.33093				DY410366	Ssc,33380
A_72_P146481	0.0211025	1.25179	2.17072	1.16186	CD70 molecule	CD70	733577	NM_001044531	Ssc,42649
A_72_P146796	0.0211025	-1.1163	-1.37477	-1.27126	SMAD family member 4	SMAD4	397142	NM_214072	Ssc,249
A_72_P165536	0.0211025	1.16587	1.65576	1.02286	p14ARF protein	P14ARF	396553	NM_213735	Ssc,15750
A_72_P171221	0.0211025	1.18619	1.55551	-1.29327
A_72_P174261	0.0211025	1.26494	1.69644	1.14335	E2F transcription factor 3	E2F3	100154407	AK395475	Ssc,22727
A_72_P177771	0.0211025	-2.53746	-1.58838	-1.39294	matrix metallopeptidase 2	MMP2	397391	NM_214192	Ssc,5713
A_72_P204557	0.0211025	1.06723	1.38109	1.18735				AK396407	Ssc,31469
A_72_P212987	0.0211025	-1.26209	-2.11925	-1.08275
A_72_P213112	0.0211025	-1.27736	-1.44955	-1.47797
A_72_P214252	0.0211025	-1.13251	-1.4646	-1.23958	NOP2/Sun RNA methyltransferase family member 3	NSUN3	100625260	XM_003358877
A_72_P217357	0.0211025	-2.4671	-2.9874	-1.62126	cAMP-dependent protein kinase inhibitor gamma	PKIG	397661	NM_214371	Ssc,18551
A_72_P220432	0.0211025	1.39797	1.18791	1.03446	zinc finger C2HC-type containing 1A	ZC2HC1A	100154167	AK393131	Ssc,36595
A_72_P220792	0.0211025	-1.21467	-1.48689	1.48323
A_72_P226822	0.0211025	1.14657	-1.17105	-1.3555
A_72_P243797	0.0211025	-1.30941	-1.37823	-1.68337
A_72_P250812	0.0211025	1.21244	-1.04414	1.14572	lactamase beta	LACTB	100152773	NM_001243362	Ssc,30646
A_72_P253727	0.0211025	1.25618	-1.00083	-1.0049				XM_013996092
A_72_P255217	0.0211025	-1.01377	-1.39849	-1.23728				ES447097	Ssc,54140
A_72_P255917	0.0211025	-1.20139	-2.27777	-1.15888
A_72_P270764	0.0211025	1.22095	1.90289	1.31608
A_72_P286059	0.0211025	-1.09278	1.78377	1.18366	cell division cycle associated 3	CDCA3	100153312	AK232080	Ssc,18198
A_72_P304154	0.0211025	-1.95844	-2.12283	-1.64589
A_72_P305344	0.0211025	1.25071	-1.06538	1.00223	NCK adaptor protein 1	NCK1	100192438	AK392504	Ssc,10338
A_72_P305954	0.0211025	-2.60189	-2.8037	-1.69933				S83199	Ssc,16087
A_72_P338558	0.0211025	-1.41383	-1.13356	-1.92479
A_72_P342558	0.0211025	1.08751	-1.56588	-1.7232
A_72_P351418	0.0211025	1.18286	-1.00342	-1.40783	HECT and RLD domain containing E3 ubiquitin protein ligase 2	HERC2	100737018	AK346716	Ssc,98455
A_72_P360363	0.0211025	-1.58167	-2.66876	1.03097
A_72_P379393	0.0211025	1.05813	1.00518	-1.25274
A_72_P386688	0.0211025	1.34837	1.40399	1.23365
A_72_P387833	0.0211025	-1.67453	-1.53246	-1.48605	phosphoribosyl pyrophosphate synthetase associated protein 2	PRPSAP2	106505248	AK351177	Ssc,64974
A_72_P394793	0.0211025	-1.03228	-2.00915	-1.00716				CN166735	Ssc,21237
A_72_P400013	0.0211025	-1.27895	-1.23896	-1.63584
A_72_P406428	0.0211025	1.38844	-1.82536	-1.78222	serine incorporator 2	SERINC2	100626004	NM_001244148	Ssc,78927
A_72_P406683	0.0211025	2.10893	1.19511	-1.13806	lysophosphatidic acid receptor 3	LPAR3	100113360	NM_001162402	Ssc,3102
A_72_P410683	0.0211025	-1.15058	-1.35318	1.0911	HEAT repeat containing 5A	HEATR5A	100152987	XM_003128526	Ssc,24371
A_72_P412608	0.0211025	-1.42538	-1.32898	-1.71451
A_72_P419204	0.0211025	1.0781	-1.25703	-1.08775	F-box protein 33	FBXO33	100157705	AK393720	Ssc,95900
A_72_P431954	0.0211025	-1.60121	-3.17484	-1.35915				AK351001	Ssc,21723
A_72_P434699	0.0211025	1.03514	-1.49576	1.0685				CV865536	Ssc,34699
A_72_P436534	0.0211025	-1.10669	-1.53745	-1.3929
A_72_P442733	0.0211025	1.23113	1.79761	1.17149	Kruppel like factor 3	KLF3	100174960	NM_001134352	Ssc,26233
A_72_P443023	0.0211025	1.25608	1.37575	1.11983	protein kinase C beta	PRKCB	100522792	AY093444	Ssc,57527
A_72_P453115	0.0211025	1.16381	-1.71998	1.18359
A_72_P491845	0.0211025	1.33981	1.02729	1.10625	mannosidase endo-alpha	MANEA	100154996	XM_001927384
A_72_P505007	0.0211025	1.4617	-1.00349	-1.82458				XM_005660566
A_72_P532288	0.0211025	-1.4715	-1.61524	1.10902	cilia and flagella associated protein 58	CFAP58	100152602	EW666118	Ssc,92726
A_72_P539248	0.0211025	-1.0312	-1.48414	-1.05308	transmembrane protein 87A	TMEM87A	100154984	AK396673	Ssc,30235
A_72_P599033	0.0211025	1.25942	1.02431	1.01676	ribosomal protein L37a	RPL37A	110257174	AK346581	Ssc,53932
A_72_P599573	0.0211025	1.02299	1.10806	-1.28713	myosin, heavy chain 4, skeletal muscle	MYH4	100144306	NM_001123141	Ssc,15909
A_72_P615690	0.0211025	-1.04436	1.01832	-1.41471	SGK2, serine/threonine kinase 2	SGK2	100157757	AK346218	Ssc,51971
A_72_P620224	0.0211025	1.95553	1.70897	-1.49477	frizzled-related protein	FRZB	100152419	NM_001243330	Ssc,8149
A_72_P628432	0.0211025	1.46182	1.06702	-1.01859	zinc finger CCCH-type containing 15	ZC3H15	100158058	AY609427	Ssc,6535
A_72_P667554	0.0211025	1.09363	1.4765	-1.11712	haptoglobin	HP	397061	NM_214000	Ssc,37
A_72_P706212	0.0211025	1.54685	1.10844	1.08416
A_72_P730188	0.0211025	-1.79653	1.00184	-1.18379	myosin light chain 1	MYL1	397666	NM_214374	Ssc,14459
A_72_P178116	0.0247853	1.1145	1.31321	1.12477	succinate dehydrogenase complex iron sulfur subunit B	SDHB	414412	NM_001104953	Ssc,55804
A_72_P283054	0.0247853	-1.10708	-1.25548	-1.17646				XM_003356412
A_72_P002326	0.0262644	1.40826	1.3379	1.22393				AK238870	Ssc,31180
A_72_P005361	0.0262644	-1.68875	-2.09621	-1.92804
A_72_P009416	0.0262644	-1.49037	-1.59778	-1.50701				AJ956542	Ssc,46063
A_72_P009876	0.0262644	1.14042	1.36101	1.0203	raftlin, lipid raft linker 1	RFTN1	100155924	AK240423	Ssc,20812
A_72_P017001	0.0262644	1.53416	-1.43975	1.54021
A_72_P020346	0.0262644	1.04887	-1.12437	-2.44327
A_72_P021346	0.0262644	-2.43614	-2.8625	-2.61352	RNA binding motif protein 25	RBM25	100511390
A_72_P021976	0.0262644	-1.02378	-1.94769	-1.0025
A_72_P024681	0.0262644	1.29389	1.19652	1.12515	vesicle transport through interaction with t-SNAREs 1B	VTI1B	404692	AK238994	Ssc,8640
A_72_P028831	0.0262644	-1.62472	-1.78904	-1.34885				XR_297813
A_72_P030481	0.0262644	1.28096	1.32931	1.27477	heterogeneous nuclear ribonucleoprotein A1	HNRNPA1	768103	NM_001077218	Ssc,49600
A_72_P032316	0.0262644	-2.25531	-1.64602	-1.08832
A_72_P033121	0.0262644	-1.38839	-2.25267	1.1103
A_72_P046286	0.0262644	1.28735	-1.26068	-1.1046				DN103006	Ssc,24154
A_72_P061541	0.0262644	-1.24357	-1.04912	-2.02017
A_72_P065116	0.0262644	-2.31895	-2.04156	-1.59973
A_72_P066551	0.0262644	-1.00254	1.46197	1.00704	cytoskeleton associated protein 4	CKAP4	100523493	NM_001244631	Ssc,16312
A_72_P067236	0.0262644	1.41271	1.33451	1.21655
A_72_P067341	0.0262644	1.29181	1.45394	1.22331	tet methylcytosine dioxygenase 1	TET1	100625859	NM_001315772
A_72_P068246	0.0262644	1.39544	2.49477	1.0253				EW088625	Ssc,67028
A_72_P076671	0.0262644	-1.46285	-1.60363	-1.43671
A_72_P078731	0.0262644	-1.13657	-1.01117	-1.42095
A_72_P081386	0.0262644	2.5175	2.09862	1.25301
A_72_P084936	0.0262644	1.0204	1.73759	-1.076				CN166416	Ssc,27077
A_72_P086096	0.0262644	1.28401	-1.09595	-1.07343	sorting nexin 16	SNX16	100157914	AK230542	Ssc,78839
A_72_P087826	0.0262644	-1.22271	-1.62133	-1.62762
A_72_P096926	0.0262644	-1.62119	-1.37676	-1.23699
A_72_P098471	0.0262644	1.00499	1.02104	-1.74806	neurofilament light	NEFL	100521224	NM_001244331	Ssc,10769
A_72_P115286	0.0262644	-1.09634	1.0478	-1.37003	6-phosphofructo-2-kinase/fructose-2,6-biphosphatase 1	PFKFB1	100233197	NM_001143721	Ssc,48821
A_72_P120591	0.0262644	1.36651	1.26054	1.23354	RNA binding motif protein 8A	RBM8A	100156173	AK344348	Ssc,2081
A_72_P127911	0.0262644	-1.62186	-1.99597	-1.92023
A_72_P131261	0.0262644	-2.13416	-2.77116	-1.33126				XM_013984403
A_72_P131511	0.0262644	1.04239	1.771	1.43653
A_72_P132806	0.0262644	1.01298	-1.26449	-1.06519				CF790032	Ssc,2239
A_72_P135466	0.0262644	-1.45048	-1.7354	-1.25094
A_72_P138626	0.0262644	1.27059	1.51653	-1.00907
A_72_P140256	0.0262644	1.29701	2.05604	1.10106
A_72_P144936	0.0262644	1.16354	1.15478	-1.25814
A_72_P145036	0.0262644	-1.20527	1.8165	-1.25178
A_72_P146311	0.0262644	1.22389	1.51962	1.11067	peroxiredoxin 5	PRDX5	397273	NM_214144	Ssc,460
A_72_P147081	0.0262644	1.35452	1.28861	1.19283	BCAS2, pre-mRNA processing factor	BCAS2	100154006	NM_001244424	Ssc,44208
A_72_P147591	0.0262644	1.67113	1.17871	1.68426				CK457921	Ssc,81362
A_72_P149136	0.0262644	1.29258	1.14707	-1.08292				DN127571	Ssc,98159
A_72_P163246	0.0262644	1.01127	-1.29656	-1.10409
A_72_P168316	0.0262644	-2.02091	-2.40983	-1.20377
A_72_P170591	0.0262644	-1.58107	-1.63585	-1.67503				AK397617	Ssc,60106
A_72_P177426	0.0262644	-1.08449	-2.43837	-1.12273	tenomodulin	TNMD	100048961	NM_001099934	Ssc,17435
A_72_P177681	0.0262644	-1.13776	-1.42137	-1.01537	glycine N-methyltransferase	GNMT	397444	NM_001110419	Ssc,16163
A_72_P178866	0.0262644	-1.71432	-1.63302	-1.2518				XM_013989733
A_72_P188161	0.0262644	-1.37685	-1.1466	1.79215				AJ948968	Ssc,36866
A_72_P189351	0.0262644	-3.61442	-3.48788	-1.75002				AJ604653	Ssc,40993
A_72_P193802	0.0262644	1.1201	-1.15824	1.23677
A_72_P197172	0.0262644	1.17517	1.73214	-1.39965
A_72_P201442	0.0262644	-1.19759	-1.27047	-1.24605	VPS8, CORVET complex subunit	VPS8	100514920	AK236462	Ssc,32001
A_72_P206952	0.0262644	1.06449	1.43938	1.14361				AK348093
A_72_P210157	0.0262644	1.51555	2.04436	1.39474
A_72_P212012	0.0262644	1.84177	1.51068	1.35086	zinc finger CCCH-type, RNA binding motif and serine/arginine rich 2	ZRSR2	100157636	AK351495	Ssc,12010
A_72_P213922	0.0262644	1.11536	2.09621	-1.17631				BX917184	Ssc,42882
A_72_P214037	0.0262644	-1.04051	1.09135	-1.2673
A_72_P217312	0.0262644	-1.54754	-1.79299	-1.55195
A_72_P218082	0.0262644	1.08427	-1.33073	-1.03574
A_72_P222077	0.0262644	1.16673	1.41127	-1.46244
A_72_P226092	0.0262644	-2.62471	-2.70113	-2.25372
A_72_P236132	0.0262644	1.40463	1.68614	-1.1108				XM_013998417
A_72_P241932	0.0262644	1.02114	1.58348	1.91905	topoisomerase (DNA) III beta	TOP3B	100155140	AK348173	Ssc,49377
A_72_P248022	0.0262644	-1.12783	1.95815	-1.04822
A_72_P248487	0.0262644	-1.36318	-1.42009	1.15179	papillary renal cell carcinoma (translocation-associated)	PRCC	100154743	XM_001924343
A_72_P249967	0.0262644	1.6602	2.9844	1.04229				EW529716	Ssc,69335
A_72_P257372	0.0262644	-2.0107	-1.80907	-1.31266	scavenger receptor class B member 2	SCARB2	414407	NM_001244155	Ssc,8609
A_72_P257437	0.0262644	1.18546	1.26434	-1.02254				ES448172	Ssc,8631
A_72_P261507	0.0262644	1.27217	1.21996	1.09441
A_72_P264887	0.0262644	-1.88488	-1.89334	-1.404	glycerol kinase	GK	100233182	NM_001143708	Ssc,33693
A_72_P269274	0.0262644	-1.53023	-1.64568	-1.43074	aryl hydrocarbon receptor	AHR	396654	NM_001303026
A_72_P276029	0.0262644	-1.05626	1.30817	-1.08392	family with sequence similarity 57 member A	FAM57A	100524042	AK350926	Ssc,49565
A_72_P290809	0.0262644	-2.0583	-1.37983	-1.88352				GQ423508	Ssc,19976
A_72_P298449	0.0262644	1.40669	1.22542	-1.10957				CK466870	Ssc,57994
A_72_P302994	0.0262644	-2.01326	-1.98113	-1.55642	ribonuclease A family member 4	RNASE4	396976	NM_213936	Ssc,97581
A_72_P303224	0.0262644	-1.26953	1.38816	1.09965	pyruvate carboxylase	PC	397630	NM_214349	Ssc,17347
A_72_P305829	0.0262644	-1.28014	-1.32297	1.02345				EW507388	Ssc,96181
A_72_P308208	0.0262644	-1.49731	-1.10827	-1.02388
A_72_P308748	0.0262644	-1.32775	-1.35045	-1.34558
A_72_P313813	0.0262644	-1.03887	1.639	1.22621
A_72_P314508	0.0262644	1.8429	1.6807	1.25177
A_72_P318318	0.0262644	1.13135	-2.21763	1.42744				BI360320	Ssc,79880
A_72_P322438	0.0262644	-1.31621	1.68569	1.02247
A_72_P324668	0.0262644	-1.5929	-1.63629	1.35232
A_72_P328658	0.0262644	-1.34423	-1.48778	-1.28236
A_72_P329123	0.0262644	1.86095	2.06223	1.83091	BTB/POZ domain-containing protein KCTD14	LOC100512181	100512181	XM_005667166
A_72_P331778	0.0262644	-1.17655	1.37013	-1.1721
A_72_P332978	0.0262644	-1.7	-1.50276	-1.18038
A_72_P335723	0.0262644	-1.86758	-1.08834	-1.06855				DY423179	Ssc,13607
A_72_P336763	0.0262644	-1.15237	-2.63098	1.03458				AJ943980	Ssc,26500
A_72_P339893	0.0262644	1.05652	-1.3195	1.0505
A_72_P341303	0.0262644	1.92407	1.44478	-1.2378
A_72_P343898	0.0262644	1.17151	1.48029	1.09193	phosphoglycolate phosphatase	PGP	100739035	AY610024	Ssc,26384
A_72_P344193	0.0262644	-1.62796	-1.53989	-1.24275				XM_013988453
A_72_P351378	0.0262644	1.12376	-1.23117	-1.45792
A_72_P355593	0.0262644	1.38273	1.39021	1.19394				FS671109	Ssc,96881
A_72_P358698	0.0262644	-1.10875	-1.48532	-1.19335	OTU domain containing 6B	OTUD6B	100157831	CN155775	Ssc,4156
A_72_P360658	0.0262644	-1.1691	1.06917	-1.20521
A_72_P364808	0.0262644	1.02848	1.32906	1.09855	MAF bZIP transcription factor G	MAFG	110255931	AK234955	Ssc,27287
A_72_P366928	0.0262644	-1.4737	-1.54955	-1.48631				XM_003359494
A_72_P370398	0.0262644	-1.10043	1.00143	-1.32632
A_72_P374203	0.0262644	-1.37545	1.24176	1.05456
A_72_P374708	0.0262644	1.68695	1.31152	1.93338				XM_003358321
A_72_P381283	0.0262644	-1.29129	2.56212	1.40822	microfibril associated protein 2	MFAP2	100523794	XM_003127644	Ssc,2445
A_72_P386718	0.0262644	-1.55652	-1.828	-1.18969
A_72_P397703	0.0262644	1.20101	2.09195	1.35259
A_72_P399163	0.0262644	-1.02388	2.12886	1.01656				AJ957415	Ssc,36090
A_72_P411068	0.0262644	-1.05786	2.46543	1.09395
A_72_P411193	0.0262644	1.15376	1.27378	1.22348
A_72_P424994	0.0262644	1.01502	1.47356	1.12108				EW387554	Ssc,41868
A_72_P431839	0.0262644	-1.08365	1.09128	-1.30425				CF792859	Ssc,21694
A_72_P432324	0.0262644	1.29028	1.64825	1.1624	nudix hydrolase 5	NUDT5	100511529	AK240277	Ssc,21840
A_72_P440066	0.0262644	-1.76997	1.38315	-1.0891	thrombomodulin	THBD	100157642	NM_001130732	Ssc,20711
A_72_P442750	0.0262644	-1.87861	1.06163	1.03835				AJ583829	Ssc,17337
A_72_P443493	0.0262644	-1.45899	1.36412	-1.43439	peptidoglycan recognition protein 3	PGLYRP3	100626786	NM_001244361	Ssc,16627
A_72_P445043	0.0262644	-1.16674	-1.03163	1.41491	interferon omega 3	IFN-OMEGA-3	100152132	NM_001164844	Ssc,84467
A_72_P476273	0.0262644	1.15934	1.54826	1.22422	histone H2A type 1-A	LOC100153329	100153329	XM_001925364	Ssc,94864
A_72_P478425	0.0262644	-1.03582	-1.88216	1.10839	olfactory receptor 4F6-like	LOC100155561	100155561	XM_003128584
A_72_P478706	0.0262644	-1.15659	-2.61019	1.10841	spectrin beta, erythrocytic	SPTB	100154659	XM_013978291
A_72_P479388	0.0262644	1.51828	1.62778	1.34075	TNF receptor associated factor 3	TRAF3	100156979	XM_005666444
A_72_P490118	0.0262644	1.12865	1.9746	-1.1821	beta-transducin repeat containing E3 ubiquitin protein ligase	BTRC	100157842	XM_003483545
A_72_P492675	0.0262644	1.82469	1.09663	1.07581
A_72_P492698	0.0262644	-1.11661	-1.45923	-1.26698	cell cycle progression 1	CCPG1	100156919	NM_001243301	Ssc,38983
A_72_P511165	0.0262644	1.57619	1.25558	1.33894	copine 3	CPNE3	100152057	AK230839	Ssc,42913
A_72_P520487	0.0262644	1.25166	1.32137	1.25389	heterogeneous nuclear ribonucleoprotein A1	HNRNPA1	768103	NM_001077218	Ssc,49600
A_72_P532663	0.0262644	1.0454	1.81468	1.1526	citron rho-interacting serine/threonine kinase	CIT	100153706	AK396922	Ssc,29502
A_72_P587241	0.0262644	1.89174	2.355	1.28214	praja ring finger ubiquitin ligase 1	PJA1	100518407	AK392479	Ssc,29803
A_72_P591684	0.0262644	-1.90151	-1.65534	-1.27017	scavenger receptor class B member 2	SCARB2	414407	NM_001244155	Ssc,8609
A_72_P619720	0.0262644	1.42594	1.35352	1.26539	prefoldin subunit 2	PFDN2	100152852	FS646601	Ssc,14225
A_72_P631385	0.0262644	1.02904	1.45437	1.1555	fatty acid binding protein 5	FABP5	574074	NM_001039746	Ssc,94127
A_72_P661857	0.0262644	1.37181	-1.06801	-1.28236	C-X-C motif chemokine receptor 4	CXCR4	396659	AK238923	Ssc,7176
A_72_P672762	0.0262644	-1.51158	-1.07788	1.05966	Kruppel like factor 4	KLF4	595111	NM_001031782	Ssc,9984
A_72_P693688	0.0262644	1.01745	1.45232	1.0462	SWI/SNF related, matrix associated, actin dependent regulator of chromatin, subfamily b, member 1	SMARCB1	100154735	AY609418	Ssc,16668
A_72_P708950	0.0262644	-1.14883	1.53012	-1.03675				XM_005656211
A_72_P709542	0.0262644	1.34166	1.03617	1.01579	DnaJ heat shock protein family (Hsp40) member C19	DNAJC19	100154656	NM_001190204	Ssc,8731
A_72_P744069	0.0262644	-1.33678	-1.53574	-1.22416	KIAA1468 ortholog	KIAA1468	100521354	XM_003121702	Ssc,18797
A_72_P753775	0.0262644	-1.26799	-1.26558	1.26371	salvador family WW domain containing protein 1	SAV1	100156165	AK231064	Ssc,81535
A_72_P786229	0.0262644	1.62396	2.0917	1.11357	immunoglobulin VDJ region	LOC100037924	100037924	U38203
A_72_P796773	0.0262644	1.1763	1.73506	1.11962	CD74 molecule	CD74	396660	NM_213774	Ssc,27786
A_72_P005656	0.0292909	1.27852	-1.05096	1.05569
A_72_P006411	0.0292909	1.05787	-1.27218	-1.07028
A_72_P013166	0.0292909	1.10422	-1.9208	-1.17159				CX058169	Ssc,33906
A_72_P015256	0.0292909	-1.09824	-1.33761	-1.07493
A_72_P024226	0.0292909	-1.11745	-1.1527	-1.46129				XM_013980280
A_72_P031886	0.0292909	1.69965	2.51272	1.74537
A_72_P036636	0.0292909	-1.09035	-1.06714	-1.28713
A_72_P040726	0.0292909	-1.22488	1.33411	-1.00909				BX673843	Ssc,18516
A_72_P044961	0.0292909	-1.00655	-1.30775	-1.55877				CO954392	Ssc,40788
A_72_P050421	0.0292909	-1.01148	-1.34592	-1.0243				BX915546	Ssc,25367
A_72_P054706	0.0292909	2.0334	1.35893	1.61067
A_72_P064376	0.0292909	1.21338	1.48349	1.1562
A_72_P077346	0.0292909	-1.24222	-1.50183	-1.25888	integral membrane protein 2B	ITM2B	595120	NM_001042375	Ssc,1037
A_72_P092741	0.0292909	-1.1673	-1.35981	-1.02527
A_72_P102306	0.0292909	-1.3219	-1.93889	-1.51022				AK345811	Ssc,28865
A_72_P111076	0.0292909	1.12963	1.63716	-1.36263	leucine rich repeat containing 75B	LRRC75B	100625262	XM_013983124
A_72_P123386	0.0292909	-3.43289	1.04934	-1.07694
A_72_P124446	0.0292909	1.14847	-1.18063	1.29921
A_72_P125491	0.0292909	-1.33185	1.4788	1.28074				DN105887	Ssc,97462
A_72_P125836	0.0292909	1.30815	-1.06208	-1.02537				XM_003360375
A_72_P126391	0.0292909	-1.10097	-1.2684	-1.1178
A_72_P128251	0.0292909	-1.27228	1.29386	1.01781				AK349144	Ssc,43023
A_72_P133861	0.0292909	-1.13132	-1.68357	-1.00348
A_72_P136401	0.0292909	-1.30007	-1.23389	-1.06406				AK236663	Ssc,97412
A_72_P155471	0.0292909	-1.01517	-1.56986	-1.0323
A_72_P157136	0.0292909	-1.03038	1.31904	1.88529				XM_013979926
A_72_P158206	0.0292909	-1.01191	-1.49795	-1.01062				BQ600034	Ssc,14079
A_72_P158491	0.0292909	1.32782	1.70581	1.1115				BQ600678	Ssc,14183
A_72_P162491	0.0292909	1.28825	1.1224	1.18278	DnaJ heat shock protein family (Hsp40) member C2	DNAJC2	100514533	AK239332	Ssc,43660
A_72_P165196	0.0292909	-1.1198	-1.63565	1.29522	coagulation factor VII	F7	733661	NM_001044591	Ssc,98202
A_72_P184601	0.0292909	1.25944	1.04397	1.22315	TatD DNase domain containing 1	TATDN1	100625102	NM_001244525	Ssc,72501
A_72_P188426	0.0292909	-1.5018	1.51192	-1.0394
A_72_P200477	0.0292909	1.36145	1.55276	1.16732	TNF receptor associated factor 3	TRAF3	100156979	XM_005666445
A_72_P212227	0.0292909	1.34549	-1.1161	-1.02814				XM_003359717
A_72_P214742	0.0292909	1.37569	1.2963	1.31747	DEAD-box helicase 18	DDX18	100153560	FD643099	Ssc,4682
A_72_P223332	0.0292909	-1.42858	1.35413	-1.07173	C-C motif chemokine ligand 4	CCL4	396668	NM_213779	Ssc,23797
A_72_P230607	0.0292909	-1.17195	-2.36013	1.30972
A_72_P245932	0.0292909	1.38182	1.15486	1.04648				XR_130541	Ssc,34963
A_72_P267202	0.0292909	1.53628	1.48702	1.48629	ataxin 7	ATXN7	100519688	BG384287	Ssc,22956
A_72_P274459	0.0292909	2.08866	1.14229	1.34672				XM_003123311	Ssc,32707
A_72_P283119	0.0292909	1.50395	1.55744	1.70229
A_72_P298334	0.0292909	1.28199	1.6966	1.17322	receptor accessory protein 2	REEP2	100520367	XM_013995145
A_72_P300754	0.0292909	-1.37236	-1.03719	-1.06116	ETS variant 6	ETV6	100157726	AK234911	Ssc,28142
A_72_P300959	0.0292909	-1.03157	1.04288	1.64959
A_72_P305069	0.0292909	1.29544	1.11155	-1.06109	recombination activating 2	RAG2	100151744	NM_001128481	Ssc,61815
A_72_P317169	0.0292909	-1.44232	1.0048	1.17515
A_72_P317843	0.0292909	-1.01706	1.01574	-1.4465	polypeptide N-acetylgalactosaminyltransferase 14	GALNT14	100738063	BF440782	Ssc,60903
A_72_P323243	0.0292909	-1.01816	1.05428	-1.2644
A_72_P332128	0.0292909	1.04096	1.18814	-1.57748				AJ961614	Ssc,46478
A_72_P337103	0.0292909	2.52923	1.41872	1.41295	acyl-coenzyme A thioesterase 4	LOC100158115	100158115	AK232960	Ssc,55692
A_72_P340118	0.0292909	1.29537	-1.00491	-1.11607				XM_013992943
A_72_P344523	0.0292909	1.52566	2.16989	1.20571	EMSY, BRCA2 interacting transcriptional repressor	EMSY	100621182	XM_013979159
A_72_P348288	0.0292909	-1.61293	1.35623	-1.04534
A_72_P355528	0.0292909	-1.03225	-1.02978	-1.36696				AK393538	Ssc,26975
A_72_P371143	0.0292909	1.16301	1.67849	1.22067
A_72_P374973	0.0292909	-1.23552	-1.39679	-1.14071	phosphatidylinositol binding clathrin assembly protein	PICALM	100519857	AK392618	Ssc,10983
A_72_P375198	0.0292909	1.48272	1.38105	1.3579
A_72_P377098	0.0292909	1.02354	1.13109	-2.10628				AK351543	Ssc,8726
A_72_P379168	0.0292909	1.40603	1.11466	1.13385				HX201980	Ssc,100218
A_72_P381628	0.0292909	1.27041	1.94587	1.08109
A_72_P385978	0.0292909	1.03881	-1.25392	-1.03402				XM_003134848
A_72_P392448	0.0292909	-1.38183	-1.73149	-1.50071				CF368794	Ssc,19161
A_72_P392553	0.0292909	1.04528	1.10453	-1.2602				CF364855	Ssc,19188
A_72_P400928	0.0292909	-2.20912	-1.44496	1.12614
A_72_P401198	0.0292909	-1.27256	-1.7072	-1.13559				BF711524	Ssc,10562
A_72_P414503	0.0292909	-1.36951	-1.29943	-2.15596	growth differentiation factor 11	GDF11	397254	NM_001244310	Ssc,15905
A_72_P415693	0.0292909	-1.34671	1.12452	-1.136				DN109641	Ssc,7987
A_72_P422709	0.0292909	1.00555	1.08713	-1.3197	calponin 3	CNN3	100049656	AK396406	Ssc,4848
A_72_P432439	0.0292909	-1.10903	1.23222	1.08138				BX667964	Ssc,21874
A_72_P449664	0.0292909	1.22543	-1.26407	1.60922	nucleolar protein 4 like	NOL4L	100511968	AK390109	Ssc,60727
A_72_P478934	0.0292909	1.00501	1.58389	1.04866				EW506245	Ssc,95992
A_72_P492005	0.0292909	1.31704	1.15657	1.10035	60S ribosomal protein L36a-like	LOC102163847	102163847	AK391963	Ssc,19487
A_72_P531308	0.0292909	1.08145	-1.29165	1.05893
A_72_P532935	0.0292909	1.07247	-1.67905	1.02569	neuropeptide S	NPS	106506150	FJ024707
A_72_P564719	0.0292909	-1.13153	-1.33938	-1.1015	CD164 molecule	CD164	100152548	AK236142	Ssc,16430
A_72_P565569	0.0292909	-1.17484	-1.45547	-1.20473	integral membrane protein 2B	ITM2B	595120	NM_001042375	Ssc,1037
A_72_P568754	0.0292909	-1.36544	-1.50417	-1.24585	integral membrane protein 2B	ITM2B	595120	NM_001042375	Ssc,1037
A_72_P578903	0.0292909	1.48581	1.28539	1.17888	ENY2, transcription and export complex 2 subunit	ENY2	100153859	NM_001243453	Ssc,11754
A_72_P640550	0.0292909	1.37778	1.15627	1.09032	transcription factor A, mitochondrial	TFAM	397279	AK230853	Ssc,48086
A_72_P647416	0.0292909	1.4816	1.98939	1.25413	paraneoplastic Ma antigen 1	PNMA1	100154070	XM_001928961	Ssc,26028
A_72_P683671	0.0292909	1.54731	1.254	1.36756	solute carrier family 38 member 2	SLC38A2	100525644	NM_001317081	Ssc,99550
A_72_P692343	0.0292909	1.67012	1.24751	1.26774				AK344659	Ssc,34964
A_72_P692777	0.0292909	-1.2838	1.11969	-1.13655	interleukin 10 receptor subunit beta	IL10RB	396657	AK235600	Ssc,15484
A_72_P706341	0.0292909	1.40949	1.53272	1.38162	heterogeneous nuclear ribonucleoprotein A1	HNRNPA1	768103	NM_001077218	Ssc,49600
A_72_P729028	0.0292909	-1.25093	-1.58481	-1.19719	glycoprotein M6B	GPM6B	100155237	AK231857	Ssc,14334
A_72_P750719	0.0292909	1.37224	1.07796	1.07819	DnaJ heat shock protein family (Hsp40) member C19	DNAJC19	100154656	NM_001190204	Ssc,8731
A_72_P772835	0.0292909	1.10962	1.08462	1.39152	suppressor of IKBKE 1	SIKE1	100156436	AK238679	Ssc,47230
A_72_P789166	0.0292909	1.2533	2.01557	1.30856
A_72_P789172	0.0292909	1.12439	1.9054	1.21694
A_72_P796439	0.0292909	1.54683	1.36737	1.22594	DnaJ heat shock protein family (Hsp40) member C19	DNAJC19	100154656	NM_001190204	Ssc,8731
A_72_P302644	0.030964	-1.88406	-1.70624	-1.48624	angiogenin	ANG	733639	NM_001044573	Ssc,4679
A_72_P010211	0.032658	1.10962	1.2379	-1.08417	calcium regulated heat stable protein 1	CARHSP1	100521547	XM_013995659
A_72_P011891	0.032658	-1.35264	-1.08198	-1.03825				AJ957978	Ssc,36244
A_72_P032986	0.032658	-1.3759	-1.48215	-1.4452
A_72_P075116	0.032658	-2.37105	-1.69553	-1.14695
A_72_P075356	0.032658	1.16798	-1.81169	1.28433				CV871009	Ssc,34408
A_72_P076166	0.032658	1.90084	1.31323	1.50316				CV866848	Ssc,80227
A_72_P077996	0.032658	1.28643	1.38005	1.05925	hypoxia inducible lipid droplet associated	HILPDA	449525	NM_001348757	Ssc,42165
A_72_P096591	0.032658	1.43915	1.10161	1.23493	solute carrier family 38 member 2	SLC38A2	100525644	NM_001317081	Ssc,99550
A_72_P101496	0.032658	-1.14715	-1.30699	-1.16874
A_72_P102586	0.032658	-1.05552	-1.5046	-1.10127
A_72_P115621	0.032658	1.39113	1.26939	-1.01351				XM_001927227	Ssc,14286
A_72_P135056	0.032658	-2.03037	-1.384	-1.46307	neuropilin 1	NRP1	100286859	AK395860	Ssc,28134
A_72_P136031	0.032658	-1.06782	-1.30213	-1.11582	proteasome activator subunit 4	PSME4	100517820	EW266126	Ssc,12797
A_72_P178006	0.032658	1.2087	1.62458	1.01512	haptoglobin	HP	397061	NM_214000	Ssc,37
A_72_P181156	0.032658	1.41974	2.12258	1.38846	lemur tyrosine kinase 2	LMTK2	100521078	BI402158	Ssc,12420
A_72_P184641	0.032658	1.04259	1.3633	1.18141
A_72_P190761	0.032658	1.74	1.92455	1.19252				XM_005665002
A_72_P194492	0.032658	-1.27289	1.03512	-1.14209
A_72_P202747	0.032658	1.20643	1.44003	1.22046				BQ603925	Ssc,94379
A_72_P204377	0.032658	1.15766	-1.16969	-1.62779
A_72_P222652	0.032658	1.54792	1.20501	1.48604
A_72_P224372	0.032658	-1.02616	1.1482	-1.4263
A_72_P224512	0.032658	1.26481	1.50075	1.29974
A_72_P227137	0.032658	1.19372	1.10488	1.4651
A_72_P228917	0.032658	-1.05564	-1.75368	1.44134				CK463057	Ssc,24687
A_72_P231992	0.032658	-2.03492	-3.00767	-1.98575
A_72_P260337	0.032658	1.15557	-1.40412	1.72				DN115907	Ssc,84441
A_72_P262157	0.032658	-1.02178	1.22171	-1.33095
A_72_P263577	0.032658	1.43225	1.56117	1.14956				BI340290	Ssc,34107
A_72_P267382	0.032658	1.28258	2.73148	1.64141
A_72_P275444	0.032658	-1.88907	-1.78975	-1.33044	coagulation factor XIII A chain	F13A1	100153504	AK238261	Ssc,26345
A_72_P281999	0.032658	-1.89364	-2.16468	-1.01756
A_72_P284164	0.032658	1.3112	2.32786	1.59649
A_72_P284209	0.032658	1.44728	1.23045	1.22444
A_72_P285529	0.032658	1.3038	-1.39901	1.34244
A_72_P293614	0.032658	-1.9621	-1.26296	-1.33776
A_72_P300854	0.032658	1.354	1.80388	1.27042	claudin 7	CLDN7	100127486	NM_001160076	Ssc,38395
A_72_P300999	0.032658	-1.63667	-1.07487	1.07402
A_72_P303254	0.032658	1.43042	1.13977	-1.01474	beta-1,3-N-acetylgalactosaminyltransferase 1 (globoside blood group)	B3GALNT1	397634	NM_214351	Ssc,13482
A_72_P319603	0.032658	1.46632	2.10969	-1.33336				CK465007	Ssc,84765
A_72_P322968	0.032658	1.04038	-1.45404	-1.13328
A_72_P348113	0.032658	1.47491	1.93503	1.40534
A_72_P355713	0.032658	-1.26217	2.08284	1.61386
A_72_P365098	0.032658	-2.40497	-1.2329	-1.40834
A_72_P411568	0.032658	1.04809	-1.49721	1.60005
A_72_P415603	0.032658	1.45112	-1.09889	1.44347				BQ599847	Ssc,97068
A_72_P431594	0.032658	-1.53525	-1.71625	-1.17624				AJ948151	Ssc,21634
A_72_P436449	0.032658	-1.33333	-1.08854	-1.09592
A_72_P441679	0.032658	1.13032	1.41169	1.07919	heart and neural crest derivatives expressed 1	HAND1	541594	NM_001014428	Ssc,96071
A_72_P442554	0.032658	-1.0269	-1.5677	-1.18685	myosin X	MYO10	396902
A_72_P442859	0.032658	-1.68965	-1.20494	-1.08561	fucosyltransferase 1 (H blood group)	FUT1	397138	NM_214068	Ssc,242
A_72_P443874	0.032658	1.30526	1.18459	1.12211	ribosomal protein S21	RPS21	100037996	NM_001097480	Ssc,842
A_72_P486409	0.032658	1.29761	-1.0008	-1.00831				XM_013982183
A_72_P500493	0.032658	-1.19818	-1.44218	-1.29614	zinc finger AN1-type containing 6	ZFAND6	100155656	AK233233	Ssc,9571
A_72_P505825	0.032658	-1.23623	1.71062	1.05204				XM_001926717	Ssc,24444
A_72_P669214	0.032658	1.22978	-1.3778	-1.2458				EW623774	Ssc,95134
A_72_P705547	0.032658	-1.58302	1.30681	-1.30475				AK349219	Ssc,22299
A_72_P706687	0.032658	-2.04065	-1.94925	-1.07233
A_72_P750764	0.032658	1.90233	1.57543	1.13298	salvador family WW domain containing protein 1	SAV1	100156165	AK231064	Ssc,81535
A_72_P018866	0.0365642	-2.18014	-1.44601	1.3269
A_72_P021366	0.0365642	-1.97726	-2.42021	-1.92814
A_72_P078081	0.0386422	1.2736	1.3298	1.09287	ribosomal protein S26	RPS26	100037997	NM_001097481	Ssc,945
A_72_P000556	0.0405659	1.14106	-1.92799	-1.37811
A_72_P002756	0.0405659	-1.49685	1.09381	-1.10973
A_72_P002971	0.0405659	-1.37559	-1.7423	-1.17143
A_72_P008041	0.0405659	-1.55678	-1.18159	-1.0423
A_72_P008086	0.0405659	1.41472	1.14103	1.21074	solute carrier family 39 member 9	SLC39A9	100158119	AK395152	Ssc,71491
A_72_P015686	0.0405659	-2.1148	-1.92185	-1.44392	heat shock protein 70,2	HSP70,2	396648	NM_213766	Ssc,5145
A_72_P017036	0.0405659	-2.53393	-1.63849	-1.17974
A_72_P020296	0.0405659	-1.49713	1.09246	-1.64222
A_72_P020686	0.0405659	-1.38499	-1.70597	-1.50362
A_72_P023916	0.0405659	-1.11587	1.27815	-1.03466	solute carrier family 38 member 5	SLC38A5	100627516	NM_001243482	Ssc,43763
A_72_P026211	0.0405659	-1.31265	-1.03801	-1.59035
A_72_P027416	0.0405659	-1.55708	-1.21624	-1.46971
A_72_P027456	0.0405659	1.68559	1.97232	1.58538
A_72_P033096	0.0405659	-1.52318	-1.47493	1.35111
A_72_P033126	0.0405659	1.08149	1.16299	-2.25827				AK230847
A_72_P033681	0.0405659	1.71059	1.65833	1.0034
A_72_P035716	0.0405659	-1.43282	1.45512	1.27267	cystatin C	CST3	733672	NM_001044602	Ssc,79605
A_72_P036621	0.0405659	1.35363	1.78929	2.15307
A_72_P040056	0.0405659	-1.28877	-1.68695	-1.35689	nucleic acid binding protein 1	NABP1	100155066	NM_001244491	Ssc,18304
A_72_P045681	0.0405659	1.37574	1.38231	1.38604
A_72_P046071	0.0405659	1.18295	1.3991	-1.11071	StAR related lipid transfer domain containing 10	STARD10	100511029	NM_001243805	Ssc,24101
A_72_P046266	0.0405659	1.49927	1.64429	1.02867
A_72_P047086	0.0405659	-1.65354	1.37753	1.21037				AJ957430	Ssc,46225
A_72_P052726	0.0405659	-1.1124	-1.48524	-1.2538	cell cycle progression 1	CCPG1	100156919	NM_001243301	Ssc,38983
A_72_P058636	0.0405659	1.09374	-1.08651	1.72616				AK345101	Ssc,5836
A_72_P069276	0.0405659	-1.70563	-2.12126	-1.69319				EW123240	Ssc,67243
A_72_P070476	0.0405659	1.44534	1.18028	1.56179
A_72_P071586	0.0405659	1.25496	1.79347	1.06971	mitochondrial calcium uniporter regulator 1	MCUR1	100520967	CK459332	Ssc,21326
A_72_P073816	0.0405659	1.12347	1.46704	-1.04586				BX666762	Ssc,1456
A_72_P075111	0.0405659	1.46814	1.46815	1.00723
A_72_P077356	0.0405659	1.774	-1.31905	1.08927	FXYD domain containing ion transport regulator 3	FXYD3	397413	NM_214208	Ssc,569
A_72_P077586	0.0405659	-2.42434	-1.83326	-1.30709	solute carrier family 11 member 1	SLC11A1	396764	NM_213821	Ssc,36903
A_72_P080591	0.0405659	-1.16159	1.40839	1.3903
A_72_P081221	0.0405659	-1.14681	-1.54057	-1.00555
A_72_P083916	0.0405659	1.85312	1.2806	1.67276
A_72_P085936	0.0405659	1.31816	-2.13733	-1.00894	polypeptide N-acetylgalactosaminyltransferase 16	GALNT16	100513992	NM_001244918	Ssc,50168
A_72_P086601	0.0405659	1.22844	1.36173	1.12509				XM_003129296	Ssc,62522
A_72_P090326	0.0405659	-1.50172	1.17559	1.61445
A_72_P092136	0.0405659	-1.24524	-1.70617	-1.58527	intraflagellar transport 80	IFT80	100515277	FS669900	Ssc,88129
A_72_P093961	0.0405659	-2.10326	-1.09014	-1.4019				AJ960223	Ssc,35740
A_72_P094961	0.0405659	1.49909	1.26581	1.20451
A_72_P095646	0.0405659	-1.62507	1.04781	-1.58545				ES447649	Ssc,20580
A_72_P097611	0.0405659	-1.00751	-1.4617	-1.22798
A_72_P101451	0.0405659	1.9742	1.14642	1.26174
A_72_P102886	0.0405659	1.15681	-1.5837	-1.20936				BE234473	Ssc,29027
A_72_P108176	0.0405659	1.92073	2.75699	1.89084				AK345964	Ssc,1694
A_72_P108391	0.0405659	-1.04137	1.65274	1.20174				HF566399	Ssc,4253
A_72_P111486	0.0405659	1.26348	1.41877	-1.41462				CO942877	Ssc,40525
A_72_P114706	0.0405659	1.02793	1.25305	1.15835
A_72_P115546	0.0405659	-1.60014	-1.57702	1.58705
A_72_P119741	0.0405659	-1.39395	-1.55555	-1.2089
A_72_P121801	0.0405659	-1.54199	-1.70754	-1.71221
A_72_P123186	0.0405659	1.5032	1.41058	-1.21807
A_72_P129126	0.0405659	1.54304	1.98064	1.05482
A_72_P132236	0.0405659	-1.83289	1.10264	-1.93434				DN132990	Ssc,23908
A_72_P132751	0.0405659	1.28663	1.79009	1.44417				CN165640	Ssc,2216
A_72_P137431	0.0405659	-1.22611	-1.58634	-1.40606
A_72_P139756	0.0405659	-1.09779	1.00651	-1.3349
A_72_P142631	0.0405659	1.09832	-1.32452	-1.4569	TATA-box binding protein like 1	TBPL1	100517563
A_72_P142706	0.0405659	-1.24735	-1.49931	1.22813
A_72_P144886	0.0405659	-1.77643	-1.07188	-1.25435
A_72_P149111	0.0405659	-1.40115	-1.43823	1.07157				XR_001306725
A_72_P151411	0.0405659	1.05195	-1.35067	-1.62982
A_72_P154331	0.0405659	1.30056	-1.07305	1.3356
A_72_P160716	0.0405659	1.81424	2.51183	1.13267
A_72_P161191	0.0405659	-1.42531	-1.67136	-1.43961
A_72_P161396	0.0405659	-1.34144	-1.68477	-1.64555
A_72_P161716	0.0405659	-1.32985	-1.58274	-1.71979
A_72_P165806	0.0405659	-1.16141	1.08224	1.59745	C-C motif chemokine ligand 21	CCL21	448797	NM_001005151	Ssc,18613
A_72_P173316	0.0405659	-1.09608	-1.67644	-1.30034
A_72_P176756	0.0405659	1.64505	1.90249	-1.00811				AK232240
A_72_P181051	0.0405659	-1.49797	-1.1127	1.05971	ADAM metallopeptidase with thrombospondin type 1 motif 1	ADAMTS1	497061	NM_001144843	Ssc,12365
A_72_P184011	0.0405659	-1.80925	1.59362	1.04667
A_72_P184216	0.0405659	-2.02042	-1.58193	-1.58223
A_72_P185341	0.0405659	1.14201	1.44112	1.12619	euchromatic histone lysine methyltransferase 2	EHMT2	100124382	NM_001101823	Ssc,12499
A_72_P185946	0.0405659	1.54223	2.34673	-1.00474	telomerase reverse transcriptase	TERT	492280	NM_001244300	Ssc,42685
A_72_P187261	0.0405659	-1.2821	1.1624	-1.29201
A_72_P190151	0.0405659	-1.94044	1.46218	1.13835				DN101016	Ssc,41217
A_72_P198007	0.0405659	-2.00467	-2.58226	-1.01233
A_72_P202847	0.0405659	-1.0462	1.38599	1.24432	mevalonate kinase	MVK	100152230	BX920550	Ssc,3345
A_72_P203522	0.0405659	1.511	-1.03617	1.79887	Ras association domain family member 8	RASSF8	100151839	AJ948558	Ssc,13458
A_72_P208697	0.0405659	1.32332	1.23807	1.10894	tyrosyl-tRNA synthetase 2	YARS2	100624597	AK347470	Ssc,23056
A_72_P209852	0.0405659	1.3323	1.10041	1.2562	influenza virus NS1A binding protein	IVNS1ABP	100302027	NM_001161649	Ssc,7460
A_72_P210772	0.0405659	1.56924	1.34689	1.13334	prostaglandin reductase 2	PTGR2	100156930	AY609479	Ssc,5013
A_72_P213987	0.0405659	1.08734	-1.2583	-1.10089
A_72_P214122	0.0405659	1.67078	1.3456	1.32652
A_72_P215827	0.0405659	1.32017	1.35581	-1.48215				BQ597959	Ssc,10780
A_72_P218842	0.0405659	1.27963	1.06214	1.27731				EW573035	Ssc,61047
A_72_P218932	0.0405659	-3.29136	-2.89266	-1.20228
A_72_P219872	0.0405659	-1.13244	1.58385	1.14233				BF443103	Ssc,60541
A_72_P220337	0.0405659	1.44748	1.03161	1.10686				XM_013981651
A_72_P220512	0.0405659	-1.9397	-1.87622	-1.10832
A_72_P224352	0.0405659	1.54108	-1.34343	1.70959
A_72_P229582	0.0405659	-1.14302	-1.50033	-1.31351				CK466046	Ssc,24841
A_72_P232652	0.0405659	-1.33458	-1.20917	-1.03632	prostaglandin reductase 1	PTGR1	397678	NM_214385	Ssc,14490
A_72_P233402	0.0405659	1.19514	1.45198	1.11615				XM_013998769
A_72_P234922	0.0405659	-1.21922	-1.05961	-1.39934	Wnt family member 2B	WNT2B	100520560	XM_003125849
A_72_P235792	0.0405659	-1.89818	-1.09654	1.60362				AK389236	Ssc,12059
A_72_P237802	0.0405659	1.95567	1.65289	1.667				EV962880	Ssc,65550
A_72_P239352	0.0405659	1.58051	1.26246	1.70287
A_72_P241037	0.0405659	1.51188	-1.76663	-1.14356				XR_001300933
A_72_P242097	0.0405659	1.8284	1.48904	1.00602
A_72_P242187	0.0405659	1.11313	1.43576	-1.25225
A_72_P248202	0.0405659	-1.32489	-1.13824	1.08394
A_72_P248947	0.0405659	-2.0766	-1.94935	-1.05675	uncharacterized LOC106509125	LOC106509125	106509125	XR_001306416
A_72_P252122	0.0405659	2.19846	2.0514	-1.3241
A_72_P253337	0.0405659	1.66277	1.49725	-1.09226				XM_005673389
A_72_P254342	0.0405659	-1.09953	1.59467	1.27382
A_72_P262522	0.0405659	-2.01539	-2.10631	-2.0975
A_72_P264617	0.0405659	-1.51943	-1.86813	-1.05734				AK395064	Ssc,96395
A_72_P267461	0.0405659	-2.65197	-2.05364	-1.74152
A_72_P269159	0.0405659	1.68002	1.19285	-1.23134
A_72_P278749	0.0405659	1.61377	1.52429	1.02623
A_72_P282404	0.0405659	1.42072	1.58651	1.79492				AJ648501	Ssc,85564
A_72_P283854	0.0405659	1.50903	1.35137	-1.09091
A_72_P284339	0.0405659	1.01181	1.10474	-1.31914				DN132142	Ssc,37731
A_72_P284979	0.0405659	1.30561	-1.10038	1.2545				DN127214	Ssc,37881
A_72_P285709	0.0405659	1.14779	1.41115	1.06041	GON7, KEOPS complex subunit homolog	GON7	100155082	NM_001167590	Ssc,18101
A_72_P287119	0.0405659	-1.67322	-1.44542	-1.04839
A_72_P287179	0.0405659	-1.51469	1.14502	-1.70196
A_72_P290884	0.0405659	-1.17425	1.42484	1.07669	anti-silencing function 1B histone chaperone	ASF1B	100192434	NM_001137625	Ssc,48468
A_72_P294034	0.0405659	1.00608	1.66683	1.32114
A_72_P300659	0.0405659	-1.00287	-1.38118	-1.09798				CF791563	Ssc,28113
A_72_P302854	0.0405659	1.45456	1.23588	1.23061	cell division cycle 42	CDC42	780428	NM_001078680	Ssc,26948
A_72_P302939	0.0405659	-1.37037	1.68265	1.38032	V-set pre-B cell surrogate light chain 1	VPREB1	767627	NM_001075117	Ssc,42642
A_72_P303174	0.0405659	-1.05516	1.2793	1.80709	interleukin 2 receptor subunit alpha	IL2RA	396814	NM_213835	Ssc,14476
A_72_P307083	0.0405659	1.41358	1.47462	1.15504	Kruppel like factor 12	KLF12	100174955	NM_001134347	Ssc,97867
A_72_P307978	0.0405659	-1.73921	-1.00602	-1.67868
A_72_P310258	0.0405659	2.0845	2.03357	1.17208
A_72_P310518	0.0405659	-1.01972	-1.71176	-2.91394
A_72_P312163	0.0405659	1.29169	-1.0657	1.25414
A_72_P312338	0.0405659	-1.14961	-1.13046	-1.33908
A_72_P319013	0.0405659	1.70107	1.60327	1.02782				AK395728	Ssc,9620
A_72_P319623	0.0405659	1.21874	-1.02097	1.34207				BI399092	Ssc,9846
A_72_P320053	0.0405659	-1.11278	-1.94057	-1.04172
A_72_P321228	0.0405659	-1.28172	-1.81357	-1.15419
A_72_P322473	0.0405659	-1.98419	1.05923	-1.26091
A_72_P322773	0.0405659	-2.714	-2.11939	-1.60598				AK235813	Ssc,31504
A_72_P328528	0.0405659	-1.1432	1.4908	1.23821
A_72_P332643	0.0405659	1.04306	-1.53105	-1.35612	leucine rich repeats and calponin homology domain containing 3	LRCH3	100514426	AK234125	Ssc,37220
A_72_P333513	0.0405659	1.55208	1.73847	-1.02893
A_72_P334348	0.0405659	-2.2867	1.05008	-1.29134
A_72_P344468	0.0405659	1.07796	1.316	-1.08387
A_72_P348213	0.0405659	1.00952	-1.31166	-1.1674	TELO2 interacting protein 2	TTI2	100526252	XR_308035
A_72_P349388	0.0405659	-1.35032	-1.22619	-1.26741				BI186082	Ssc,11621
A_72_P350768	0.0405659	1.29698	1.02215	-1.05086
A_72_P357248	0.0405659	-1.22046	-1.56569	-1.22068
A_72_P358008	0.0405659	1.46935	1.29687	1.05099
A_72_P358358	0.0405659	-1.79243	1.09618	-1.16655	ATPase phospholipid transporting 9A (putative)	ATP9A	100136901	NM_001114672	Ssc,45320
A_72_P359633	0.0405659	1.22418	1.47153	1.14487	angiopoietin like 4	ANGPTL4	397628	AK398906	Ssc,17345
A_72_P362148	0.0405659	-2.21785	-1.56085	-1.2443
A_72_P363313	0.0405659	1.27683	1.70507	-1.01421
A_72_P363763	0.0405659	1.24596	1.4704	1.02226
A_72_P364278	0.0405659	-1.13733	-1.02409	-2.4951
A_72_P365333	0.0405659	-1.08097	-1.50717	-1.33914				DN122500	Ssc,87214
A_72_P366688	0.0405659	-1.05165	1.30506	1.07855	RALY heterogeneous nuclear ribonucleoprotein	RALY	100157085	AK397904	Ssc,30917
A_72_P366743	0.0405659	-1.43664	-2.0568	1.52708	cilia and flagella associated protein 45	CFAP45	100515727	CO990849	Ssc,99291
A_72_P368353	0.0405659	1.52845	1.8641	1.08109
A_72_P371423	0.0405659	1.16512	2.03101	1.40019
A_72_P375718	0.0405659	-1.35509	1.06177	-2.46389
A_72_P375748	0.0405659	-1.33822	1.06615	-1.07594	protein tyrosine phosphatase, receptor type E	PTPRE	100155079	XM_013983886
A_72_P376548	0.0405659	-1.45566	-1.13376	-1.32755				AJ951939	Ssc,9391
A_72_P377788	0.0405659	1.37232	1.98987	1.25569	transforming growth factor alpha	TGFA	397484	AK395228	Ssc,94427
A_72_P381058	0.0405659	-1.15197	-1.28402	-1.09593
A_72_P381778	0.0405659	-1.17993	-1.52906	-1.20873
A_72_P381903	0.0405659	1.41812	1.24246	1.06514
A_72_P384263	0.0405659	-1.01606	-1.46712	-1.09551				XR_001306427
A_72_P385068	0.0405659	1.25656	1.62302	1.27566				EW651939	Ssc,80518
A_72_P386118	0.0405659	-1.07938	-1.31061	-1.32097				XM_001926825
A_72_P390548	0.0405659	1.67286	1.29588	-1.26375
A_72_P394733	0.0405659	1.11396	2.09492	-1.20282				CF792040	Ssc,98046
A_72_P397798	0.0405659	-1.35493	-1.5756	-1.10312
A_72_P401558	0.0405659	1.25354	1.21101	-1.55617				DY429667	Ssc,10673
A_72_P403023	0.0405659	-1.34941	1.05161	-1.1904	carnitine palmitoyltransferase 1A	CPT1A	399527	NM_001129805	Ssc,53771
A_72_P404633	0.0405659	1.65762	1.6092	1.1429				XM_003131846
A_72_P405798	0.0405659	-1.95041	-1.94821	-1.66571	purinergic receptor P2Y1	P2RY1	503666	AK348897	Ssc,36621
A_72_P408633	0.0405659	-1.44601	-1.12491	1.14409				AK233565	Ssc,4665
A_72_P415623	0.0405659	-1.10093	-1.85119	-1.10023
A_72_P420479	0.0405659	-1.44471	-1.42805	-1.04905				XR_001300056
A_72_P421909	0.0405659	-1.12249	1.03668	-1.41846				AJ952485	Ssc,53331
A_72_P428429	0.0405659	1.06396	-1.05458	-1.38318
A_72_P430944	0.0405659	-1.55744	-1.17266	-1.01138	uncharacterized LOC100157548	LOC100157548	100157548	AK233405	Ssc,100253
A_72_P433319	0.0405659	-1.28175	1.06882	-1.24926				BI404889	Ssc,13351
A_72_P434929	0.0405659	1.57729	1.59709	1.27481	TSR1, ribosome maturation factor	TSR1	110256073	AK396803	Ssc,22443
A_72_P435004	0.0405659	-1.64768	-1.73785	1.45712				CV864120	Ssc,34767
A_72_P435729	0.0405659	1.90783	1.59298	-1.44338
A_72_P436809	0.0405659	-1.56752	-1.43791	-1.25652				EW058661	Ssc,84683
A_72_P442553	0.0405659	1.34787	1.08937	1.09057	60S ribosomal protein L36a	LOC100623428	100623428	AK391963	Ssc,19487
A_72_P442944	0.0405659	1.15767	1.61859	1.21578	fatty acid binding protein 3	FABP3	399532	NM_001099931	Ssc,93758
A_72_P443031	0.0405659	1.21258	1.67563	1.12565				BF192323	Ssc,42683
A_72_P444306	0.0405659	1.25067	1.75765	1.15208	immunoglobulin lambda-like polypeptide 5	LOC100152327	100152327	NM_001243319	Ssc,22661
A_72_P444310	0.0405659	1.26874	1.95083	1.21934
A_72_P444621	0.0405659	-1.13516	1.55002	1.2513				AK348923	Ssc,67158
A_72_P453659	0.0405659	-1.46425	-1.30415	-1.17525	solute carrier family 16 member 8	SLC16A8	100524435	XM_003126028
A_72_P471840	0.0405659	1.81591	2.22945	1.42575	frizzled-related protein	FRZB	100152419	NM_001243330	Ssc,8149
A_72_P472231	0.0405659	-1.79042	-1.35572	1.53497
A_72_P472491	0.0405659	1.8679	-1.0356	1.43244	serpin family E member 2	SERPINE2	397542	NM_214287	Ssc,96372
A_72_P475841	0.0405659	1.13645	-1.25696	1.04931	protein kinase N2	PKN2	100154766	XM_001929424	Ssc,9980
A_72_P476531	0.0405659	1.28155	1.54371	-1.16054	zinc finger and SCAN domain containing 23	ZSCAN23	100522500	XM_013977537
A_72_P477870	0.0405659	1.19281	1.4558	1.2701	heterogeneous nuclear ribonucleoprotein A/B	HNRNPAB	100127170	NM_001112695	Ssc,82964
A_72_P479658	0.0405659	1.68105	1.44686	1.14088	intestinal cell kinase	ICK	100511822	XM_013978456
A_72_P487824	0.0405659	-1.05134	-1.37856	-1.30791				XM_005657292
A_72_P489249	0.0405659	1.48035	1.63384	-1.19451	2-aminoethanethiol dioxygenase	ADO	100153304	BQ604597	Ssc,82222
A_72_P489642	0.0405659	-1.27513	-1.71332	1.06245
A_72_P489945	0.0405659	-1.11156	-1.6113	-1.40331	zinc finger protein 518A	ZNF518A	100153530	XM_001928137	Ssc,94317
A_72_P491260	0.0405659	1.34367	1.22107	1.13765	RALBP1 associated Eps domain containing 1	REPS1	100154803	AK350996	Ssc,11142
A_72_P492224	0.0405659	2.0438	2.20115	-1.12647	RWD domain containing 2A	RWDD2A	100155667	AK230738	Ssc,37479
A_72_P492436	0.0405659	-1.15099	-1.51439	1.49008				XM_013992872
A_72_P502206	0.0405659	1.15481	-1.14937	-1.19869	COP9 signalosome subunit 2	COPS2	100125956	AY609422	Ssc,13757
A_72_P505347	0.0405659	-1.03118	1.36848	1.49003				XM_005657076
A_72_P509288	0.0405659	1.47822	1.20227	1.82835
A_72_P513647	0.0405659	1.066	1.27796	-1.38237
A_72_P514059	0.0405659	1.01109	-1.44417	-1.98595	collagen type VI alpha 2 chain	COL6A2	100101552	AB237779	Ssc,51244
A_72_P533639	0.0405659	1.3578	1.37412	1.18606	NADH:ubiquinone oxidoreductase subunit B8	NDUFB8	448979	AK394130	Ssc,11515
A_72_P536919	0.0405659	-1.51677	-1.46273	-1.29562	mucin 19, oligomeric	MUC19	396897	NM_001113286	Ssc,68696
A_72_P542388	0.0405659	1.32883	1.11843	1.18043	chloride channel CLIC like 1	CLCC1	100155876	XM_005663603
A_72_P557510	0.0405659	1.07361	-1.85269	-1.61423	myotilin	MYOT	100101550	NM_001099941	Ssc,50438
A_72_P568364	0.0405659	-1.03594	1.06356	-2.04527	doublesex and mab-3 related transcription factor 1	DMRT1	397199	NM_214111	Ssc,321
A_72_P570849	0.0405659	1.40725	1.07935	1.25863	eukaryotic translation initiation factor 4A2	EIF4A2	100101928	NM_001100195	Ssc,10843
A_72_P572769	0.0405659	-1.0091	1.39372	1.15135	fatty acid binding protein 5	FABP5	574074	NM_001039746	Ssc,94127
A_72_P586631	0.0405659	1.40889	1.07517	1.24549	eukaryotic translation initiation factor 4A2	EIF4A2	100101928	NM_001100195	Ssc,10843
A_72_P595214	0.0405659	1.44697	1.0446	1.30889	eukaryotic translation initiation factor 4A2	EIF4A2	100101928	NM_001100195	Ssc,10843
A_72_P596874	0.0405659	1.30921	1.08956	1.03414	prefoldin subunit 5	PFDN5	106504162	AK399913	Ssc,4439
A_72_P601268	0.0405659	-1.05234	-1.17177	-1.25839	actinin alpha 2	ACTN2	100157406	NM_001243666	Ssc,763
A_72_P610399	0.0405659	-1.45831	-1.64489	-1.24917				CK453325	Ssc,98522
A_72_P624641	0.0405659	-1.28719	1.20337	1.04948	RecQ like helicase 4	RECQL4	100524433	AK398352	Ssc,78915
A_72_P644409	0.0405659	1.04358	1.30316	1.12061	calmodulin 3	CALM3	396838	NM_001244209	Ssc,50156
A_72_P657173	0.0405659	-1.46527	-1.18808	-1.26689	transthyretin	TTR	397419	NM_214212	Ssc,52340
A_72_P661351	0.0405659	-1.14165	-1.82084	-1.38344	indian hedgehog	IHH	397174	NM_001244470	Ssc,15785
A_72_P669017	0.0405659	1.19949	1.70754	1.20006	ribose 5-phosphate isomerase A	RPIA	100038014	NM_001097495	Ssc,23972
A_72_P669094	0.0405659	1.30271	1.13015	1.17147	SEC62 homolog, preprotein translocation factor	SEC62	100125961	AK391969	Ssc,41909
A_72_P669640	0.0405659	1.47947	-1.29942	-1.21353				XM_001929238
A_72_P670563	0.0405659	1.19288	-1.25668	1.10652	chromogranin B	CHGB	397154	NM_214081	Ssc,79899
A_72_P673481	0.0405659	1.37735	-1.07493	1.13472	kelch domain containing 2	KLHDC2	100154557	AK239067	Ssc,51893
A_72_P688621	0.0405659	-2.36748	-1.98077	-1.28493	signal regulatory protein alpha	SIRPA	494566	NM_001011508	Ssc,30461
A_72_P689477	0.0405659	-1.5962	-1.59034	-1.07091	serpin family G member 1	SERPING1	100144304	NM_001123194	Ssc,20728
A_72_P705275	0.0405659	2.06508	1.8894	1.06326
A_72_P709650	0.0405659	1.28125	1.1099	1.06922	density regulated re-initiation and release factor	DENR	100156971	AY609734	Ssc,96209
A_72_P709745	0.0405659	1.36329	1.57071	1.0479				DN120814	Ssc,99475
A_72_P710390	0.0405659	1.07834	1.78304	1.11614	IgG heavy chain	LOC396781	396781	NM_213828	Ssc,39099
A_72_P711963	0.0405659	1.11404	1.83693	1.10378	IgG heavy chain	LOC396781	396781	AK237886	Ssc,17718
A_72_P731063	0.0405659	2.96228	1.71867	1.32815	DnaJ heat shock protein family (Hsp40) member C19	DNAJC19	100154656	NM_001190204	Ssc,8731
A_72_P734683	0.0405659	1.18002	1.45639	1.07532	GON7, KEOPS complex subunit homolog	GON7	100155082	NM_001167590	Ssc,18101
A_72_P786223	0.0405659	1.12947	1.93644	1.15947	immunoglobulin heavy variable 3-23	LOC100038328	100038328	U38210
A_72_P001901	0.0451922	-1.57331	-1.43383	-1.16653
A_72_P008396	0.0451922	1.40869	2.13482	1.11563
A_72_P010216	0.0451922	1.46259	1.11295	1.6876
A_72_P011316	0.0451922	-1.01809	1.3088	1.09609	Yip1 domain family member 3	YIPF3	100156290	AK394357	Ssc,20600
A_72_P020837	0.0451922	-1.05311	1.56624	1.20801				AK233842	Ssc,25117
A_72_P021701	0.0451922	-1.16759	-1.54355	1.04288
A_72_P034396	0.0451922	1.61591	1.57993	1.1123
A_72_P043756	0.0451922	-1.74174	-1.07152	-1.03063
A_72_P050841	0.0451922	-1.6884	-1.80678	-1.28811
A_72_P051761	0.0451922	-1.32938	-1.44678	-1.12896
A_72_P062126	0.0451922	1.40178	1.25727	1.07165
A_72_P073226	0.0451922	2.1797	1.64176	1.19212				DN103747	Ssc,1242
A_72_P085786	0.0451922	1.17322	-1.61623	1.2138	neuropeptide S receptor 1	NPSR1	100217399	AK236979	Ssc,50120
A_72_P088286	0.0451922	1.20712	1.59576	1.17203	adrenomedullin 5 (putative)	ADM5	100101476	NM_001099939	Ssc,85201
A_72_P112671	0.0451922	1.14963	2.00807	1.40663				EW219437	Ssc,68074
A_72_P132386	0.0451922	1.1749	1.51052	1.09298				CK452180	Ssc,23944
A_72_P135161	0.0451922	1.4654	1.04198	2.23712
A_72_P136731	0.0451922	-1.03197	-1.283	-1.31337
A_72_P144516	0.0451922	-1.21713	1.35872	-1.04713
A_72_P146561	0.0451922	2.0616	1.39425	1.15591	resistin like beta	RETNLB	100037943	NM_001103210	Ssc,51681
A_72_P152101	0.0451922	1.03516	1.40756	1.12423	prostaglandin E synthase 2	PTGES2	100155133	AK235999	Ssc,84270
A_72_P162621	0.0451922	-1.02872	-1.46308	-1.23401				XM_003123822
A_72_P181511	0.0451922	1.01856	1.41803	1.13491	TBC1 domain family member 7	TBC1D7	100155821	AK400445	Ssc,12543
A_72_P181996	0.0451922	1.28303	1.43653	-1.34022
A_72_P187476	0.0451922	1.18237	1.0935	-1.30126
A_72_P188821	0.0451922	-1.52205	-1.14147	1.01523
A_72_P209412	0.0451922	-1.01434	-2.01229	1.10299				XM_005669938
A_72_P222492	0.0451922	-1.71508	-1.31266	-1.1272	periplakin	PPL	100512773	CK454248	Ssc,45214
A_72_P225422	0.0451922	-1.22878	-1.75769	-1.3698
A_72_P229152	0.0451922	1.29165	-1.00406	1.07497
A_72_P236282	0.0451922	1.25555	-2.42043	1.58619				BI401402	Ssc,12211
A_72_P246622	0.0451922	-1.12802	-1.0185	-1.2951
A_72_P263547	0.0451922	-1.07803	-1.33738	1.05139				CV876725	Ssc,34100
A_72_P282794	0.0451922	-1.73697	-1.61818	-1.81373
A_72_P291394	0.0451922	1.14411	2.20649	1.32377
A_72_P292514	0.0451922	1.45591	1.673	-1.31485
A_72_P295984	0.0451922	-1.02283	1.32009	1.93673
A_72_P300834	0.0451922	1.20283	-1.02674	2.33426
A_72_P302389	0.0451922	-1.11786	-1.18233	1.37085	interleukin 20 receptor subunit beta	IL20RB	100620875	AK351425	Ssc,89697
A_72_P302899	0.0451922	-1.02999	1.32981	1.07071	A-Raf proto-oncogene, serine/threonine kinase	ARAF	397601	NM_214329	Ssc,2370
A_72_P306183	0.0451922	-1.92329	-1.27632	-1.03664	fibroblast growth factor 1	FGF1	397497	X60317	Ssc,16246
A_72_P307613	0.0451922	-1.09013	1.89737	1.09902
A_72_P313458	0.0451922	-2.05453	-1.85939	-1.44264				AY609735	Ssc,17560
A_72_P327028	0.0451922	1.32535	1.13419	-1.04903	dual specificity tyrosine phosphorylation regulated kinase 3	DYRK3	100739107	AK352176	Ssc,18577
A_72_P336058	0.0451922	1.15267	1.34622	-1.53325
A_72_P339383	0.0451922	-2.24117	-2.12412	-1.77477
A_72_P341698	0.0451922	-1.14184	1.05812	-1.39122				XM_005657173
A_72_P347648	0.0451922	-1.2221	-1.13697	-1.50486				EW470256	Ssc,69115
A_72_P357493	0.0451922	-1.04863	1.32442	1.07266
A_72_P364438	0.0451922	-1.68278	-1.52192	-1.4816
A_72_P388773	0.0451922	-1.31504	-2.24658	1.15086
A_72_P392308	0.0451922	1.5045	2.02587	-1.03616	gap junction protein beta 2	GJB2	110255786	AK392079	Ssc,19122
A_72_P404913	0.0451922	1.05501	1.2718	1.09649				XM_005673368
A_72_P437169	0.0451922	-1.11169	1.48866	-1.00666	centromere protein M	CENPM	100286777	NM_001159305	Ssc,48784
A_72_P440331	0.0451922	1.32513	1.16166	1.23696	nuclear receptor coactivator 3	NCOA3	100135659	NM_001114276	Ssc,69931
A_72_P440866	0.0451922	-1.01257	-2.05961	-1.33349	HNF1 homeobox A	HNF1A	574067	NM_001032388	Ssc,42738
A_72_P442893	0.0451922	1.382	2.08926	1.09019				XM_005655958
A_72_P442936	0.0451922	1.17956	1.49434	1.28576	fatty acid binding protein 3	FABP3	399532	NM_001099931	Ssc,93758
A_72_P474624	0.0451922	1.49289	-1.16524	2.31694
A_72_P487498	0.0451922	1.14544	1.26303	1.03593	nucleophosmin/nucleoplasmin 2	NPM2	100154488	NM_001195362	Ssc,41766
A_72_P489277	0.0451922	2.68902	3.12628	1.38048	DnaJ heat shock protein family (Hsp40) member C12	DNAJC12	100153566	XM_001925242	Ssc,18084
A_72_P499295	0.0451922	1.55623	1.03172	1.0686
A_72_P502296	0.0451922	-1.15964	-1.36658	-1.22918				EW343215	Ssc,97524
A_72_P502534	0.0451922	1.43106	1.43989	1.29113				AK392054	Ssc,15300
A_72_P503867	0.0451922	-1.43509	-1.65142	-1.26781	syntaxin 11	STX11	100152253	XM_001926239	Ssc,18802
A_72_P509283	0.0451922	-1.12502	1.35801	1.1234				XM_001928912
A_72_P530513	0.0451922	1.27261	1.21836	-1.21496				BP163057	Ssc,38775
A_72_P555885	0.0451922	-1.05627	1.17205	1.42339	adenylate cyclase 4	ADCY4	100152067	XM_013978180
A_72_P569109	0.0451922	1.44398	1.07092	1.24627	eukaryotic translation initiation factor 4A2	EIF4A2	100101928	NM_001100195	Ssc,10843
A_72_P597673	0.0451922	1.32051	1.61914	1.38516				FN392680	Ssc,32914
A_72_P643890	0.0451922	1.28265	1.06328	-1.12593	neuronal regeneration related protein	NREP	100037285	EF416570	Ssc,55114
A_72_P704201	0.0451922	1.49194	1.1692	1.40628				XM_005671828
A_72_P765361	0.0451922	1.3049	1.41032	1.19669	MHC class II histocompatibility antigen SLA-DQA	SLA-DQA1	100153387	AY285932	Ssc,31763
